1     **Sequence-based GWAS in 180 000 German Holstein cattle**  
2             **reveals new candidate genes for milk production traits**

3     Ana-Marija Križanac<sup>1,2\*</sup>, Christian Reimer<sup>2,3</sup>, Johannes Heise<sup>4</sup>, Zengting Liu<sup>4</sup>, Jennie Pryce<sup>5,6</sup>,  
4             Jörn Bennewitz<sup>7</sup>, Georg Thaller<sup>8</sup>, Clemens Falker-Gieske<sup>1,2 §</sup>, Jens Tetens<sup>1,2 §</sup>

5  
6     <sup>1</sup>Department of Animal Sciences, University of Goettingen, Burckhardtweg 2, 37077 Göttingen,  
7     Germany

8     <sup>2</sup>Center for Integrated Breeding Research, Department of Animal Sciences, University of  
9     Goettingen, Albrecht-Thaer-Weg 3, 37075 Göttingen, Germany

10    <sup>3</sup>Institute of Farm Animal Genetics, Friedrich-Loeffler-Institut, 31535 Neustadt, Germany

11    <sup>4</sup>Vereinigte Informationssysteme Tierhaltung w.V. (VIT), 27283 Verden, Germany

12    <sup>5</sup>Agriculture Victoria Research, AgriBio, Centre for AgriBioscience, Bundoora, Victoria 3083,  
13    Australia

14    <sup>6</sup>School of Applied Systems Biology, La Trobe University, Bundoora, Victoria 3083, Australia

15    <sup>7</sup>Institute of Animal Science, University of Hohenheim, 70599 Stuttgart, Germany

16    <sup>8</sup>Institute of Animal Breeding and Husbandry, Christian-Albrechts-University, 24118 Kiel,  
17    Germany

18    §These authors jointly supervised this work

19    \*Corresponding author

20 E-mail addresses:

21 AMK: ana-marija.krizanac@uni-goettingen.de, ORCID: 0000-0002-7446-8031

22 CR: Christian.Reimer@fli.de, ORCID: 0000-0002-9697-2511

23 JH: Johannes.Heise@vit.de, ORCID: 0000-0002-7605-7148

24 ZL: Zengting.Liu@vit.de, ORCID: 0000-0002-7112-0320

25 JP: jennie.pryce@agriculture.vic.gov.au, ORCID: 0000-0002-1397-1282

26 JB: j.bennewitz@uni-hohenheim.de, ORCID: 0000-0001-6450-1160

27 GT: gthaller@tierzucht.uni-kiel.de, ORCID: 0000-0002-6782-2039

28 CFG: clemens.falker-gieske@uni-goettingen.de, ORCID: 0000-0001-9160-1909

29 JT: jens.tetens@uni-goettingen.de, ORCID: 0000-0001-5352-464X

30

## 31 **Abstract**

### 32 **Background**

33 The use of genome-wide association studies (GWAS) has led to the identification of numerous  
34 quantitative trait loci and candidate genes in dairy cattle. To obtain sufficient power of GWAS and  
35 to identify quantitative trait nucleotides, whole-genome sequence data is required. Sequence data  
36 facilitates the identification of potential causal variants; however, sequencing of whole genomes  
37 is still expensive for a large number of animals. Imputation is a quick and efficient way of obtaining  
38 sequence data from large datasets. Milk production traits are complex and influenced by many

39 genetic and environmental factors. Although extensive research has been performed for these  
40 traits, with many associations unveiled thus far, due to their crucial economic importance, complex  
41 genetic architecture, and the fact that causative variants in cattle are still scarce, there is a need for  
42 a better understanding of their genetic background. In this study, we aimed to identify new  
43 candidate loci associated with milk production traits in German Holstein cattle, the most important  
44 dairy breed in Germany and worldwide. For that purpose, 252,285 cattle were imputed to the  
45 sequence level and large-scale GWAS was carried out to identify new association signals.

## 46 **Results**

47 We confirmed many known and identified 30 previously unreported candidate genes for milk, fat,  
48 and protein yield. While all of the genes were functionally associated with the traits, some showed  
49 pleiotropic effects as well. Specifically, association with mammary gland development, fatty acid  
50 synthesis, metabolism of lipids, or milk production QTLs in other farm animals has been reported.  
51 Variants associated with these genes explained a large percentage of genetic variance, compared  
52 to random ones.

## 53 **Conclusions**

54 Our findings proved the power of large samples and sequence-based GWAS in detecting new  
55 association signals. In order to fully exploit the power of GWAS, one should aim at very large  
56 samples combined with whole-genome sequence data. Although milk production traits in cattle  
57 are comprehensively researched, the genetic background of these traits is still not fully understood,  
58 with the potential for many new associations to be revealed, as shown in our study. With constantly  
59 growing sample sizes, we expect more insights into the genetic architecture of production traits in  
60 the future.

## 61 **Background**

62 Intensive selection for milk production traits enhanced with improved nutrition and management,  
63 as well as reproductive technologies and accelerated by genomic selection (reviewed by [1]), has  
64 strongly increased milk production over the years [2]. The Holstein breed is dominant in milk  
65 production worldwide. The German Holstein population alone comprises 2.4 million cows, with  
66 an average milk yield of 10,000 kg per lactation [3]. The breeding goal for German Holstein is  
67 balanced and includes many traits that can be grouped into milk production, health, fertility, and  
68 longevity [4]. This has not always been the case, and although selection for milk production has  
69 been successful in increasing milk yield, it has also been associated with a higher incidence of  
70 mastitis, metabolic and reproductive diseases [5]. The relative weight of milk production in total  
71 merit indices is decreasing as new traits are continuously added to the breeding goal. However,  
72 because production still makes up a substantial part (e.g. 36% in Germany), there is the risk of a  
73 further decline in animal health. More extensive knowledge of the genetic architecture of economic  
74 traits is needed, especially given that the majority of these traits are complex traits, influenced by  
75 many genes and environmental factors.

76 So far, genome-wide association studies have been successful in the discovery of quantitative trait  
77 loci (QTL) and candidate genes (reviewed by [6]), however, only a few causal variants for  
78 economically important traits in cattle have been confirmed [7, 8]. In order to be able to detect the  
79 underlying causal variant whole-genome sequence (WGS) data and large samples are needed to  
80 ensure sufficient power of GWAS [9, 10]. GWAS in cattle is restricted by long-distance linkage  
81 disequilibrium (LD) segments [11], due to a small effective population size ( $N_e$ ) caused by intense  
82 selection [12], therefore making it hard to pinpoint the true causal variant which may be hidden

83 among the many variants in LD. Another source of difficulty in revealing the true associations is  
84 the highly polygenic genetic architecture of quantitative traits, i.e. large number of variants with  
85 small effects affecting the trait [13]. Genotypes from whole-genome sequences obtained from  
86 sequencing the study individuals are limited, especially when large samples are considered. In that  
87 case, imputation [14] can be utilized as a method of obtaining the sequence-dense data. Imputation  
88 methods exploit LD patterns among the individuals in the sample and reference dataset, with the  
89 assumption that apparently unrelated animals inherited haplotype blocks from a common ancestor  
90 [15]. Imputation accuracy depends on various factors such as the size of the reference panel, the  
91 relationship between the individuals in the reference and sample dataset, imputation software  
92 choice and the number of the variants to be imputed [16–18]. In cattle, sequence-level imputation  
93 is usually performed in two steps [18], due to higher accuracy obtained when first imputing from  
94 a lower to a higher-density SNP chip, and then to sequence level.

95 To exploit the power of large sample size in detecting novel causative loci, we carried out GWAS  
96 for three milk production traits using imputed sequence data. After obtaining GWAS summary  
97 statistics with a mixed linear model approach, meta-analysis was utilized to pool the results of  
98 different animal groups. Candidate gene search was performed for top variants from GWAS with  
99 the lowest  $p$ -values and functional enrichment analysis was done to confirm the candidate genes.  
100 Finally, the percentage of genetic variance explained by the top SNPs was calculated to see which  
101 proportion of the variance could be attributed to variants associated with the novel candidate loci.

## 102 **Methods**

### 103 **Dataset**

104 The dataset for imputation consisted of 252,285 German Holstein cows with 45,613 SNP markers.  
105 Animals were mainly genotyped with various low-density SNP genotyping arrays (see Additional  
106 file 1: Table S1) and then imputed to 50K level according to the national genetic evaluation  
107 procedure [19], or genotyped with various 50K SNP chips (see Additional file 1: Table S1). The  
108 dataset was collected during the KuhVision project that aimed to genotype and phenotype German  
109 Holstein cows to establish a large-scale female reference population for genomic evaluation. The  
110 phenotypes for milk (MY), fat (FY), and protein yield (PY) in kg were obtained in the form of  
111 deregressed proofs (DRPs), which are pseudo-phenotypes produced using the special single-step  
112 SNP BLUP model for deregressing genomic estimated breeding values (GEBV) [20].

### 113 **Imputation**

114 The genomic coordinates of the input genotypes were lifted from the previous bovine reference  
115 genome assembly UMD 3.1. to the ARS-UCD1.2 with a custom approach. CombineVariants from  
116 the Genome Analysis Toolkit (GATK) v. 3.8.1.0 [21] was used to merge the samples by  
117 chromosomes and by groups. The sample of 252,285 cows consisting of 30 autosomal and sex  
118 chromosome pairs was imputed to sequence level in a two-step imputation approach using the  
119 BEAGLE v. 5.2 [22]. The effective population size parameter was set to 1000. The animals were  
120 first imputed to high-density (HD) genotype level using the genotype data of 1278 Holstein cows  
121 consisting of 585,517 markers [23]. The HD reference panel was phased using BEAGLE v. 5.1  
122 beforehand [24]. In the next step, data were imputed to the WGS level using the multi-breed  
123 reference panel from the 1000 Bulls Genome Project Run9 [25]. The reference panel consisted of  
124 5116 cows and bulls of the species *Bos taurus* (see Additional file 1: Table S2). Both imputation  
125 steps were performed chromosome-wise, with the samples divided into groups of approximately  
126 equal size, due to high computational demand. The imputed files were indexed afterwards with

127 IndexFeatureFile, GATK v. 4.2.2.0, merged by the sample groups, and split into separate lines due  
128 to the presence of multi-allelic variants (SNPs, insertions, and deletions) using BCFtools v. 1.14  
129 [26]. As a quality control, the imputed WGS dataset was filtered using the dosage R-squared  
130 parameter, a measure of the estimated squared correlation between estimated and true allele dosage  
131 (DR2; [27]). Markers imputed with  $DR2 < 0.75$  were removed with BCFtools. The imputed WGS  
132 dataset was annotated with VariantAnnotator from the GATK v. 4.2.2.0 using the Ensembl  
133 variation database, release 105 [28] imported from dbSNP [29], to account for SNPs without rsID.

## 134 **GWAS**

135 Since phenotype measurements were not available for all 252,285 animals, the sample for GWAS  
136 consisted of 180,217 WGS-imputed cows with phenotypic observations for MY, FY, and PY.  
137 Samples were filtered for minor allele frequency (MAF)  $> 0.01$ . Due to memory restrictions of the  
138 high-performance computing (HPC) cluster, the samples were divided into 4 groups consisting of  
139  $\sim 45,000$  animals each. GWAS was performed using the GCTA software v. 1.93.2 beta [30]  
140 applying a mixed linear model approach (MLMA) for all autosomes. The SNP effects were  
141 estimated using the following model:

$$142 \quad y = Xb + Zu + e$$

143 where  $y$  is a vector of DRPs;  $b$  is the fixed effect of the variant tested for the association with each  
144 trait;  $X$  is a vector containing the genotype score for the tested SNP;  $u$  is the vector of polygenic  
145 effects with  $u \sim N(0, G\sigma^2u)$ , where  $G$  is genomic relationship matrix (GRM) calculated using 50K  
146 SNP genotypes from all chromosomes, and  $\sigma^2u$  is a variance of polygenic effects;  $Z$  is the incidence  
147 matrix of  $u$ ; and  $e$  is the vector of residual effects with  $e \sim N(0, I\sigma^2e)$ , with  $I$  being an identity  
148 matrix and  $\sigma^2e$  residual variance. Bonferroni correction was used to set a genome-wide

149 significance threshold, corresponding to a  $p$ -value of 0.05/number of markers. The Manhattan plots  
150 were created using RStudio v. 3.6.3 [31]. METAL software [32] for meta-analysis was used to  
151 merge the GWAS summary statistics of each of the four animal groups per trait, using the approach  
152 that takes into account test statistics and standard errors. To correct for genomic inflation, lambda  
153 ( $\lambda_{GC}$ ) values were calculated as the median of observed  $\chi^2$  test statistics divided by the expected  
154 median of  $\chi^2$  distribution with one degree of freedom.

### 155 **Downstream analyses**

156 SnpEff [33] and SnpSift [34] were utilized for functional annotation of genome-wide significant  
157 variants and prediction of their effect on genes, as well as the identification of the closest genes.  
158 The R packages cluster profiler [35] and DOSE [36] were used to carry out an over-representation  
159 analysis (ORA) [37] to determine whether the genes positioned closest to the genome-wide  
160 significant variants are enriched in the known biological pathways. ORA was performed using the  
161 Kyoto Encyclopedia of Genes and Genomes (KEGG) [38] database for variants that passed the  
162 significance threshold of 0.001/number of markers with enrichKEGG ( $q$ -value > 0.25). Candidate  
163 genes were also investigated manually, through the Animal Quantitative Trait Loci database  
164 (Animal QTLdb) [39] and using the publications previously associated with milk production  
165 candidate genes, based on the STRING database [40]. A Venn diagram of common candidate  
166 genes was created using the R package VennDiagram [41]. The percentage of genetic variance  
167 explained by the top 50 genome-wide significant SNPs and 50 random SNPs across all  
168 chromosomes was calculated using GCTA's genomic-relatedness-based restricted maximum-  
169 likelihood (GREML) approach [42], by fitting the GRMs together in the model with 50K SNP  
170 chip variants. The analysis was done for the smaller subset of 45,000 animals due to high



171 computational demand. PLINK v. 1.9 [43] was used to prune the variants in high linkage  
172 disequilibrium, based on pairwise  $R^2$  correlation greater than 0.5 (--indep-pairwise 50 5 0.5).

## 173 **Results**

### 174 **Imputation**

175 To evaluate the genotype liftover quality, we examined the allele frequency (AF) concordance  
176 between the imputed WGS dataset and Run9, by plotting the AF from BTA16 of the two datasets  
177 against each other. Allele frequencies of imputed variants were congruent with the ones from 1000  
178 Bulls Run9, showing the coherence in the frequency for the majority of loci (Figure S1).  
179 Imputation quality control was carried out by utilizing the DR2 parameter, built into the BEAGLE  
180 software. Markers imputed with  $DR2 < 0.75$  were removed with BCFtools, leaving the 20,737,793  
181 markers for further analyses. Then, we checked the DR2 values of known causal variants, such as  
182 two variants in the *DGATI* gene, which were imputed with almost perfect quality ( $DR2=0.99$ ), as  
183 well as rs385640152 in the *GHR* gene with  $DR2=0.98$ , and rs211210569 in *MGST1* with  $DR2=1$ .  
184 After the imputation of 252,285 animals to sequence level, and filtering for DR2 and MAF,  
185 17,256,703 variants were left for GWAS.

### 186 **GWAS**

187 A large number of variants exceeded the genome-wide significance threshold. GWAS analyses  
188 identified 54,032 significant variants for MY, 42,323 for FY, and 35,106 for PY, with the highest  
189 number of associations on chromosomes 5, 6, and 14 (Figures 1-3). Low  $p$ -values were observed  
190 for many SNPs, with top variants positioned on bovine chromosome (BTA) 14: rs109050667 ( $p =$

191  $7.04 \times 10^{-737}$ ), rs136630297 ( $p = 7.18 \times 10^{-380}$ ), and rs109050667 ( $p = 2.38 \times 10^{-221}$ ) for MY, FY and  
192 PY, respectively.

193 The top 50 variants from each chromosome were chosen for further research (see Additional file  
194 2: Tables S1-S3). Considering that significant associations have not been identified on every  
195 chromosome and that some chromosomes had less than 50 significant variants, the number of top  
196 variants chosen for further investigation differed across chromosomes and traits. For MY, 1012  
197 top SNPs were found within or in proximity of 109 genes from 25 chromosomes (see Additional  
198 file 1: Table S3). The top candidate genes on chromosomes with the highest number of significant  
199 SNPs were *MGST1* and *SLC15A5* on BTA5, *GC*, *NPFFR2*, *ENSBTAG00000049290* and *SLC4A4*  
200 on BTA6, *ADCK5*, *CPSF1*, *SLC52A2*, *SLC39A4*, *FBXL6*, *TMEM249* and *SCRT1* on BTA14.

201 For FY, the top 962 SNPs from 24 chromosomes were located within or close to 108 genes (see  
202 Additional file 1: Table S3). The top candidate genes were *MGST1* and *SLC15A5* on BTA5, *GC*,  
203 *NPFFR2*, *ENSBTAG00000049290* on BTA6, *CPSF1*, *SLC39A4*, *ADCK5*, *TMEM249*, *SCRT1*,  
204 *SLC52A2*, *FBXL6* and *ENSBTAG00000053637* on BTA14.

205 For PY, 1065 top SNPs from 26 chromosomes were located close to or in 172 genes (see  
206 Additional file 1: Table S3). The candidate genes associated with the most significant genomic  
207 regions were: *GC*, *NPFFR2*, *ENSBTAG00000049290*, and *SLC4A4* on BTA6, *ABCC9*, *ST8SIA1*,  
208 *ENSBTAG00000026611* and *CMAS* on BTA5. Many genes were found to be associated with the  
209 same traits, as shown on the Venn diagram (Figure 4). The highest number of common candidate  
210 genes were found between MY and PY (47). The second highest number of candidate genes was  
211 between FY and PY (27), 7 genes were in common for MY and FY, and 23 genes were in common  
212 for all three traits (see Additional file 1: Table S4). Lambda values, calculated to assess for false  
213 associations were as follows:  $\lambda_{MY} = 1.764$ ,  $\lambda_{FY} = 1.898$ , and  $\lambda_{PY} = 1.928$ . The reason for increased

214 genomic inflation factors was due to the meta-analysis that inflated the  $p$ -values and therefore the  
215 number of genome-wide significant variants. To assess the effect of meta-analysis on inflation we  
216 divided the individuals from direct-GWAS summary statistics into smaller groups, running the  
217 GWAS for each of these groups again, and merging them into a meta-analysis. The lambda values  
218 were higher after merging the animals into meta-analysis compared to direct GWAS summary  
219 statistics for the same individuals (Figure 5).

## 220 **Downstream analyses**

221 SnpEff was used to predict the functional effects of genome-wide significantly associated variants  
222 on proteins and to identify the closest genes. The majority of variants were identified in introns  
223 (46.41%) or intergenic regions (37.46%). The number of predicted effects was larger than the  
224 actual number of variants, due to genes with multiple transcripts and variants which affect multiple  
225 genes. A detailed description of the variant effects by type is available in an additional file (see  
226 Additional file 1: Table S5). Regarding the variant impact on proteins, a high majority of variants  
227 were classified as modifiers (98.38%), and only 0.025% were high-impact variants. Of the 50 top  
228 variants which were further investigated, the same high-impact, frameshift variant was found for  
229 both PY and MY on BTA16, at 80,129,589 bp, in the *SYT2* gene. One frameshift variant was also  
230 found for FY on BTA3, at 7,933,141 bp in the *FCGR2B* gene.

231 KEGG functional enrichment analysis revealed a large number of over-represented terms. To  
232 narrow the list of possible terms, ORA was performed only for genes associated with variants that  
233 passed the genome-wide significance threshold of 0.001/number of markers. A list of all over-  
234 represented genes and associated pathways is available in an additional file (see Additional file 1:  
235 Table S6). The common dot plot of the 20 most significant terms of KEGG analysis for MY, FY,

236 and PY is shown in Figure 6. The top variants were found in or in proximity to the genes over-  
237 represented in 23 pathways, mostly in the PI3K-Akt signaling pathway (Table 1). Two terms were  
238 significantly enriched with all three traits.

239 The percentage of genetic variance explained by 50 top variants, as well as by 50 random variants  
240 from all autosomal chromosomes was estimated for all three traits (Table 2). For MY, 1012 top  
241 variants from 25 chromosomes explained 8.67% of the variance. Random SNPs from 29 autosomal  
242 chromosomes, explained on average 0.78% of the variance. As for FY, 962 top SNPs from 24  
243 chromosomes accounted for 7.04% of the genetic variance, while the random 1450 variants from  
244 all chromosomes explained about 0.31%. For PY, 6.66% of the variance was explained by 1065  
245 top SNPs from 26 chromosomes, and 0.37% was due to random 1450 variants. After LD pruning  
246 of the top variants for each trait, there were 124, 147, and 182 variants left for MY, FY, and PY,  
247 respectively. Genetic variance explained by pruned variants was 10.01% for MY, 6.51% for FY,  
248 and 5.17% for PY.

249

## 250 **Discussion**

### 251 **Imputation**

252 In this study, we performed a stepwise imputation of 252,285 German Holstein cows from SNP  
253 chip up to sequence level, which makes our sample size one of the largest imputed in cattle so far.  
254 The stepwise imputation approach seems to improve the imputation accuracy, as previously shown  
255 in cattle [18, 44]. Imputation error rate tends to decrease when an intermediate reference panel is  
256 used [44], possibly due to a larger choice of possible haplotype matches between WGS and  
257 medium-density SNP chip, which are narrowed down when using an HD panel as an intermediate

258 [18]. In our study, stepwise imputation was done using the Holstein breed HD panel, a subset from  
259 van den Berg et al. [23] as an intermediate step, and the WGS panel from 1000 Bulls Genome  
260 Consortium, as a second step. The WGS-based panel consisted of various breeds of taurine cattle  
261 (see Additional file 1: Table S2). The usage of a multi-breed reference was shown to increase the  
262 imputation accuracy in many studies in cows [45–47], especially for low-frequency variants [46].  
263 However, multi-breed panels can be counter-productive if animals in the reference panel are too  
264 distant from the sample dataset [48]. The usage of BEAGLE software for imputation can at least  
265 partly overcome this issue since its algorithms can prioritize between the closer and the genetically  
266 distant individuals in the multi-breed reference panel [49]. Moreover, the 1000 Bulls reference  
267 panel consisted of a large number of Holstein animals (~1200) making them the most represented  
268 breed in the reference panel (see Additional file 1: Table S2), therefore enabling the reliable  
269 imputation of Holsteins even in the presence of genetically distant breeds. Another crucial factor  
270 to consider is the value of the  $N_e$  parameter [49]. Default  $N_e$  in BEAGLE is 1,000,000, however,  
271 this corresponds to the human populations for which was it initially developed. Therefore, updating  
272 the  $N_e$  parameter to smaller values is needed, when working with other, less-diverse populations  
273 [49].

274 To evaluate the accuracy of imputation we used the second category of quality measures [50] based  
275 on estimated genotypes (DR2) since SNP array genotyped animals were not whole genome  
276 sequenced. Filtering the variants with  $DR2 < 0.8$  is recommended when using DR2, as the  
277 imputation error rate increases below this threshold [49] hence we filtered out all the variants with  
278  $DR2 < 0.75$ . Known causal variants were left in the dataset after DR2 filtering, and were imputed  
279 with near to perfect quality ( $DR2=0.98$  to 1). *DGATI* causal variants were among the 100 top  
280 genome-wide significant variants for all three traits analyzed but were not the top variants. A

281 possible explanation for this could be the presence of additional variation in the form of a known  
282 variable number of tandem repeats (VNTR) in the *DGATI* region or low imputation accuracy [47,  
283 51, 52]. To assess the liftover quality, AF concordance between the imputed WGS dataset and the  
284 Run9 reference panel was examined on the example of chromosome 16, showing the congruence  
285 for the majority of variants between the two datasets (see Additional file 1: Figure S1).

286

### 287 **GWAS and candidate gene research**

288 After carrying out the GWAS, possible candidate genes were retrieved by searching public  
289 databases such as Animal QTLdb and reviewing journal papers on previously reported candidate  
290 genes and QTLs. We confirmed many of the previously reported QTLs and candidate genes (see  
291 Additional file 1: Table S7 and Additional file 3: Tables S1-S3) such as *DGATI* and its variants  
292 rs109326954 and rs109234250 on BTA14, *MGST1* on BTA5, *ABCG2* on BTA6, *GC* on BTA6  
293 and *GHR* on BTA20, but also discovered new, previously unreported loci (Table 3). There were a  
294 large number of genes whose functions have not been reported yet, as well as the ones whose  
295 functions could not be associated with milk production or content (see Additional File 4: Table  
296 S1). Therefore, these genes were not considered as potential candidate genes. For simplification,  
297 we discussed only candidate genes associated with the most significant SNPs, while the list of all  
298 associations can be found in Additional file 3: Tables S1-S3. The majority of the most significant  
299 variants were intronic (37%) and intergenic (30%) (see Additional file 1: Table S5). Most of the  
300 significant variants that were included in candidate gene research were non-coding as well, which  
301 is in line with the majority of other GWAS publications [53–55]. Nayeri et al. [55] showed that a  
302 large proportion of the most significant variants affecting milk yield and composition traits in  
303 Holstein and Jersey cattle were located in non-coding regions of the genome. Both intron and

304 intergenic variants usually do not code for proteins, making their functional prediction challenging  
305 [56]. However, recent research in human studies (reviewed by [53]) and cattle [57] has shown that  
306 even the variants in non-coding regions may play an important part in complex traits and diseases,  
307 by indirect involvement in gene expression regulation. Known QTNs in livestock are not all coding  
308 variants that cause a change in amino acid [6, 58], therefore, variants in non-coding regions can be  
309 causal as well [57]. Xiang et al. [59] showed that non-coding variants can contribute substantially  
310 to variance in complex traits in cattle.

311 Due to the large sample sizes in our study, which might contribute to the rise in genomic inflation  
312 [60], lambda values were measured before and after performing the meta-analysis. Genomic  
313 inflation is a spurious association between a variant and trait, where the relationship between a  
314 phenotype and SNP seems to arise from different factors than the true association [61]. These  
315 factors include population stratification [62], cryptic relatedness [63], polygenic inheritance [61],  
316 or strong association between variant and phenotype [64]. Although some of the genomic inflation  
317 in our study might be attributed to the polygenicity of milk production traits [65], and population  
318 structure in German Holstein [66], the main source of genomic inflation was the use of meta-  
319 analysis software (Figure 5). Similar findings were reported in human studies [67], where large  
320 number of individuals are often pooled into the meta-analysis. The use of meta-analysis was  
321 inevitable in our case, due to the large samples that our HPC cluster was not able to utilize. MLMA  
322 accounted properly for genomic inflation, as the direct GWAS summary statistic had lambda  
323 values below 1 (Figure 5), and values up to 1 are usually considered as a threshold for genomic  
324 inflation. To prove that inflation was not due to population structure amplification that might arise  
325 when pooling the samples into the meta-analysis [68], we divided one of the animal groups on  
326 which we obtained summary statistics. After the animals were divided into two groups, GWAS

327 was run for each of them again. Then, after obtaining the summary statistics, two groups of samples  
328 are merged into the meta-analysis. As shown in Figure 5, lambda values for the same samples were  
329 increased after pooling into a meta-analysis. Moreover, an increase in the number of animal groups  
330 pooled into meta-analysis led to higher genomic inflation (Figure 5). Considering that many factors  
331 that could lead to an increase in lambda values were present in our study, including the polygenic  
332 nature of the milk production traits, large sample sizes, potential underestimated relationships  
333 between animals, and in the end, the use of meta-analysis, we consider the values we obtained on  
334 meta-analyzed traits (1.764-1.928) acceptable even though they exceeded the generally accepted  
335 threshold of 1.

### 336 **Candidate genes for milk yield**

337 The novel candidates that appeared to be the most relevant for further validation experiments due  
338 to their role in organism will be discussed here, while the list of all novel candidate genes and their  
339 roles connected with milk production traits are listed in Table 3. Except for the functional  
340 involvement of the candidate genes with milk production traits, and the fact that some of them are  
341 reported in other mammal species for the same or similar traits, variants found in candidate genes  
342 need experimental validation to be considered causative. For this purpose, prioritization of  
343 genome-wide significant variants according to external evolutionary and functional information  
344 [59] is suggested as the next step, followed by sequencing and gene editing experiments.

345 As for the new associations, we identified 9 genes that, to our knowledge, were not previously  
346 described in cattle for milk yield or related traits. On chromosome 2, we identified two intergenic  
347 variants whose positions fall between the *FEV* and *CDK5R2* genes. While *FEV* was reported  
348 earlier [69], *CDK5R2* has not been associated with milk traits in cattle yet. *CDK5R2* (Cyclin



349 Dependent Kinase 5 Regulatory Subunit 2 (p39)) acts as one the activators of the *CDK5* gene [70]  
350 that has numerous important roles in the nervous system [71]. Talouarn et al. [72] identified the  
351 variants in the region of this gene to be associated with milk yield in French dairy goats. *CDK5R2*  
352 was previously associated with somatic cell count (SCC) in dairy cattle [73], and meat color traits  
353 in Nellore cattle [74], and crossbred and purebred pigs [75]. The variant in this gene has been  
354 associated with teat length in Chinese Holstein, in the study of Wu et al. [76]. Given the previous  
355 association with milk yield in the goat population, as well as with udder-related traits in cattle, this  
356 gene presents a strong candidate for further research.

357 A downstream variant of the *PRDMI* gene on BTA9 at 43,842,866 bp, was significantly associated  
358 with MY. *PRDMI* (PR Domain Zinc Finger Protein 1), or *BLIMP1* (B-Lymphocyte-Induced  
359 Maturation Protein 1) was described as an essential factor for mammary development in mouse  
360 studies [77]. Ahmed et al. [77] discovered that a group of luminal alveolar progenitor cells,  
361 expressing *BLIMP1*, were essential for mammary gland development. *BLIMP1* is required for  
362 ductal morphogenesis in puberty and alveolar maturation in pregnancy and lactation, with its  
363 inactivation causing inadequate milk secretion [77]. In another study [78] *BLIMP1* was described  
364 as necessary for the delay of the intestinal epithelium maturation from suckling to adult-type  
365 intestinal epithelium, with mutant mice showing growth disturbances and increased mortality.

366 One intron variant in the *FBXL19* gene was associated with MY. *FBXL19* (F-Box And Leucine  
367 Rich Repeat Protein 19) regulates cell migration and proliferation [79, 80] and acts as a major  
368 regulator of adipogenesis [81]. Adipose tissue is a source of energy for various organs and tissues,  
369 as well as for the mammary gland especially during lactation when it serves as a source for fatty  
370 acids synthesis [82]. Adipogenesis is essential for the efficiency of milk production in dairy cows,  
371 as well as reproduction [83] making this gene an interesting candidate for milk production traits.

## 372 **Candidate genes for fat yield**

373 Eight novel candidate genes were associated with FY in our study. The majority were involved  
374 with various lipid metabolism functions, therefore, we will describe only a few in the main text,  
375 while the description of the rest of the genes and their functions is available in Table 3.

376 One intergenic region between the *STK25* and *BOK* was significantly associated with fat yield on  
377 BTA3. While *BOK*, a member of the family of BCL-2 proteins which are involved in many cellular  
378 processes [84], couldn't be linked to milk production traits, *STK25* attracted our attention as a  
379 candidate for fat yield and composition. *STK25* (serine/threonine protein kinase 25) belongs to the  
380 germinal center kinase III subfamily of Ste20 (sterile 20) proteins that exhibit various cell  
381 functions (reviewed in [85]). *STK25* was shown to regulate lipid catabolism in liver cells in humans  
382 and the release of non-esterified fatty acids (NEFA) from lipid droplets [86]. High levels of NEFA  
383 seem to stimulate the expression of the *CIDEA* gene, and consequently increase fatty acid synthesis  
384 *de novo* and milk fat secretion [87]. *CIDEA* was recently described as a regulator of *de novo* fatty  
385 acid synthesis in cattle as well [88]. In general, high levels of NEFA are associated with ketosis  
386 and fatty liver, poor reproductive performance, and negative energy balance in early lactation  
387 (reviewed by [89]). Another study indicated a plausible role of this gene in the regulation of lipid  
388 and glucose metabolism in the skeletal muscle of rodents and humans [90]. Altogether, *STK25*  
389 seems to have an important role in lipid metabolism and therefore is recommended for further  
390 investigation.

391 On BTA16, one intron variant was found in *KLHL12*, a gene described as essential for the secretion  
392 of apolipoprotein B100 (apoB100) very low-density lipoprotein (VLDL) particles in rat hepatoma  
393 cell line [91]. ApoB100, a major component of VLDL, is essential for the transport of triglycerides,

394 the main component of milk fat, from the liver to peripheral tissues [92, 93]. Decreased levels of  
395 apoB100 in cattle have been reported in cows with metabolic disorders such as ketosis, milk fever,  
396 and displaced abomasum [94, 95]. *KLHL12* (Kelch-like Family Member 12) is a member of the  
397 Kelch-like family (KLHL) of proteins with important functions in the ubiquitination of proteins as  
398 reviewed by Shi et al. [96]. When it comes to known roles of the *KLHL12*, it has been reported as  
399 a negative regulator of the Wnt signaling pathway [97], important for various cell functions in both  
400 adult and embryonal tissue homeostasis (reviewed in [98]). It also seems to have a key role in  
401 collagen secretion [99]. Everything considered, this gene could potentially affect not only milk  
402 production traits due to its role in triglyceride transport but health traits as well, and because of  
403 this further validation is needed.

#### 404 **Candidate genes for protein yield**

405 For protein yield, many known candidate genes, as well as the pleiotropic effects of some genes  
406 were confirmed (see Additional file 1: Table S7), while 18 genes from 12 chromosomes are  
407 reported here, for the first time (Table 3). As for the genes with pleiotropic effects, three intergenic  
408 variants were positioned between the *FEV* and *CDK5R2* on BTA2, a gene that we found to be a  
409 novel candidate for MY in the previous paragraph. The five variants on BTA3 were located in or  
410 downstream of the *STK25* gene, showing the effects of this new candidate gene on both fat and  
411 protein yield. Then, on BTA9, 21 variants were located in or in proximity to *PRDMI*, identified  
412 in both MY and PY GWAS. The majority of *PRDMI*-associated variants were intergenic,  
413 however, variant rs136669229 ( $p = 1.009 \times 10^{-10}$ ) was identified as missense, causing the Valine to  
414 Phenylalanine amino acid change, however, there was no difference in protein structure prediction.  
415 On BTA16, one intron variant was located within the *KLHL12* gene, whose function is described

416 in detail in the FY section. Finally, we identified an intron variant in the *FBXL19* gene, our  
417 candidate gene for MY.

418 In the proximity of *STT3A* on BTA9, one variant was significantly associated with PY. *STT3A*  
419 (STT3 Oligosaccharyltransferase Complex Catalytic Subunit A) encodes the protein which is a  
420 part of the central enzyme complex in glycosylation [84]. Glycosylation is a post-translational  
421 protein modification that takes place in the endoplasmic reticulum (ER) and is essential for  
422 numerous cellular functions [100]. The two main types of glycosylation are N and O-glycosylation.  
423 N-glycosylation consists of the attachment of an oligosaccharide N-Acetylglucosamine to  
424 Asparagine residues and occurs in both eukaryotes and prokaryotes [101, 102]. The most important  
425 step in N-glycosylation is catalyzed by the oligosaccharyltransferase (OST) complex, consisting  
426 of different subunits of which the STT3 subunit is the most important [103]. In the study of human  
427 milk lactoferrin glycosylation [104], the expression of *STT3* in milk somatic cells decreased from  
428 day 4 to day 15 of lactation, leading to changes in the overall level of glycosylation [104].  
429 Lactoferrin is a milk-derived glycoprotein with many important roles in organism including  
430 immunomodulatory and anti-inflammatory, anticancer, and antimicrobial functions [105].  
431 Therefore, the *STT3A* gene might affect the protein yield, and possibly play a role in mastitis given  
432 the antibacterial function [105] of lactoferrin.

433 An intron variant was found within the *RBI* (retinoblastoma 1) gene on BTA12. *RBI* is known for  
434 its role in regulating the metabolism of glycolipids in the liver, muscle, and adipose tissues and  
435 improving fat and protein metabolism disorders [106]. A study on *RBI* knockout-mouse showed  
436 the potential involvement of *RBI* in the gut microbiota and intestinal free fatty acids profiles [107],  
437 altogether making this gene a strong candidate for further research.

438

## 439 **Downstream analyses**

440 In the KEGG enrichment analysis, a large number of trait-associated genes were found within  
441 various pathways and biological processes. However, we restricted our analysis only to genes  
442 containing one of the top SNPs (Table 3). The highest number of genes (7) were involved in the  
443 PI3K-Akt signaling pathway, one of the most important signaling pathways that affect many  
444 biological functions, including cell metabolism, growth, migration, proliferation, and survival  
445 [108, 109]. Hou et al. [110] showed that *EEF1D* regulates milk lipid secretion and mammary gland  
446 development through interaction with various pathways, including PI3K-Akt. Genes involved in  
447 this pathway (Table 1) were all previously reported as candidates for milk production and  
448 composition traits (see Additional file 1: Table S7). Other pathways and terms involved with milk  
449 composition, synthesis, and secretion or mammary development processes included biosynthesis  
450 of amino acids, biosynthesis of cofactors, prolactin signaling pathway [111], ErbB signaling  
451 pathway [112], Hedgehog signaling pathway [113], fatty acid metabolism, Hippo signaling  
452 pathway [114] and ECM-receptor interaction [115]. The term “biosynthesis of amino acids”  
453 included the gene *PKLR*, a known candidate gene for milk yield and composition traits [116], with  
454 a role in the regulation of triglyceride levels and fatty acid synthesis [117]. KEGG category  
455 “biosynthesis of cofactors” contained three genes, across the three traits. Of these genes, *FLADI*  
456 was associated with MY in our study and was previously reported as a candidate gene for milk  
457 calcium content and lactose percentage [118, 119]. Expression of gene *GMPPA*, whose variants  
458 were associated with FY, was positively correlated with bovine milk fat globule size in the study  
459 of Huang et al. [120]. This pathway was also enriched with *VKORC1L1*, a gene involved in vitamin  
460 K metabolism [121], across two traits. Although this gene couldn’t be linked to milk production,  
461 it was described as a candidate gene for subclinical ketosis in Holstein in the study of Soares et al.

462 [122]. Interestingly, it has an important role in adipogenesis, with *VKORC1L1* mutated mice  
463 having smaller length and weight than wild type [123], making the possible role in milk fat  
464 metabolism plausible. Prolactin signaling pathway was enriched with genes *TH*, *STAT5A*,  
465 *STAT5B*, and *STAT3* for MY. Prolactin (*PRL*) is a gene well-known for its role in mammary  
466 development and lactation in many mammal species, as well as in cattle [111, 124]. *STAT5A*,  
467 *STAT5B*, and *STAT3* genes belong to the STAT family of transcription factors that participate in  
468 the PRL receptor (*PRLR*) signaling pathway [111] and were previously associated with milk  
469 composition traits in GWAS in Holstein cattle [125]. *STAT5A* and *STAT5B* were also enriched in  
470 the ErbB signaling pathway for MY. The members of the ErbB family of tyrosine kinase receptors  
471 regulate mammary gland development and have an important role in lactation [126]. The  
472 Hedgehog signaling pathway is required for normal development of various mammalian organs.  
473 Although the research results on its role in mammary gland development have been inconsistent,  
474 the latest insights showed that it has an important role in mammary ductal morphogenesis [113].  
475 Gene found in this category for FY included *PTCH1*, a known regulator of mammary ductal  
476 morphogenesis [127] that has never been associated with milk production traits in cattle thus far.  
477 *SCD*, a gene reported to participate in fatty acid synthesis in Italian Holstein and Simmental GWAS  
478 [128] was enriched in the fatty acid metabolism pathway as well for FY, which is in line with the  
479 aforementioned findings. Another gene enriched in the term “fatty acid metabolism” for FY was  
480 *HSD17B12*, previously reported as a candidate gene for fat yield [125]. The hippo signaling  
481 pathway regulates various biological processes in the organism, including potential role in  
482 pregnant and lactating mammary gland [114]. This pathway was enriched for the *NKD2*, gene  
483 described as a candidate gene for MY, FY, and PY in German Black Pied cattle [129]. Extracellular  
484 matrix (ECM) components are involved in mammary gland development processes as reviewed

485 by Xu et al. [130]. Genes involved in this pathway, *THBS3* and *LAMA5*, were associated with MY.  
486 Both were previously reported as milk production and milk composition candidates [55, 131] and  
487 were found to be significantly enriched in the PI3K-Akt signaling pathway, as well. Many genes  
488 showed pleiotropic effects by involvement with the same terms across the three traits, which is in  
489 agreement with our candidate gene analysis, and previous research of other authors, as cited above.

490 The percentage of trait variance explained by the 50 most significant and 50 random variants from  
491 each chromosome, or so-called SNP-based heritability [132] was calculated to see how much of  
492 the genetic variance is attributable to top SNPs chosen for candidate gene research. To avoid  
493 overestimation of variance previously reported when using GREML [133], a GRM set up from  
494 50K SNP chip data was included in the model, to account for further polygenic variance. Top  
495 SNPs explained much more variance than random ones (Table 2) indicating the potential presence  
496 of causal variants among those and underpinning the infinitesimal model. To eliminate multiple  
497 variants in high LD to each other that represent the same QTL, we pruned out the SNPs taking into  
498 account correlations between genotype allele counts [43]. Surprisingly, results differed depending  
499 on the trait; for MY, variants that were left after pruning explained more variance than the initial  
500 set of top SNPs. We expected that because the pruned variants spread over more QTL and should  
501 thus capture more variance. For FY and PY, however, pruned variants explained less variance than  
502 top SNPs. This could potentially be related to allelic heterogeneity in *DGATI* because it can be  
503 assumed that the multiple variants capture more segregating variants [52].

## 504 **Conclusions**

505 After performing large-scale GWAS we identified 30 new candidate genes for three milk  
506 production traits; MY (9), FY (8), and PY (18), of which 6 genes (*CDK5R2*, *STK25*, *PRDMI*,

507 *KLHL12*, *RNF152*, and *FBXL19*) showed pleiotropic effects. These novel, functionally plausible  
508 candidates have not been reported for these traits so far. Variants located within or close to these  
509 genes explained a comparatively large proportion of genetic variance. In order to be able to fully  
510 exploit the power of GWAS, sequence data of very large samples are required, as shown in our  
511 study. Our findings add to existing knowledge of milk production traits architecture and  
512 convincingly demonstrate the power of our data set and strategy. Future studies incorporating  
513 health traits and their relationship with milk production may leverage the power of this data to add  
514 to the improvement of animal welfare.

515

#### 516 **List of abbreviations**

517 AF – allele frequency

518 apoB100 – apolipoprotein B100

519 BTA – *Bos taurus* autosome

520 CNVR – copy number variation

521 DR2 – dosage R-squared

522 DRPs – deregressed proofs

523 FY – fat yield

524 GEBV – genomic estimated breeding values

525 GREML – genomic-relatedness-based restricted maximum-likelihood

526 GRM – genomic relationship matrix



- 527 GWAS – genome-wide association study
- 528 HD – high density
- 529 HPC – high-performance computing
- 530 KEGG – Kyoto Encyclopedia of Genes and Genomes
- 531 LD – linkage disequilibrium
- 532 MAF – minor allele frequency
- 533 MLMA – mixed linear model approach
- 534 MY – milk yield
- 535  $N_e$  – effective population size
- 536 NEFA – non-esterified fatty acids
- 537 ORA – over-representation analysis
- 538 PY – protein yield
- 539 SCC – somatic cell count
- 540 SCS – somatic cell score
- 541 VLDL – very low-density lipoprotein
- 542 WGS – whole-genome sequence
- 543

544 **Declarations**

545

546 **Ethics approval and consent to participate**

547 Not applicable. No live animals or animal material have been used in this study.

548

549 **Consent for publication**

550 Not applicable.

551

552 **Availability of data and materials**

553 The SNP chip genotype data and deregressed proofs are not available because they are the property  
554 of the national computing center in Germany (Vereinigte Informationssysteme Tierhaltung w.V.).  
555 Imputed genotypes and summary statistics will be provided upon reasonable request.

556 **Competing interests**

557 The authors declare that they have no competing interests.

558 **Funding**

559 This work is part of the project “QTCC: From Quantitative Trait Correlation to Causation in dairy  
560 cattle” and is funded by the Deutsche Forschungsgemeinschaft (DFG) (project number  
561 448536632).

562 **Authors’ contributions**

563 AMK performed the imputation, GWAS, and downstream analyses and wrote the paper. CR  
564 performed the genotype liftover and participated in genomic inflation analyses. JH provided the  
565 50K SNP chip dataset, JP provided the HD reference dataset, and ZL provided the DRPs and gave  
566 useful comments. CFG participated in imputation and downstream analyses. CFG and JT  
567 supervised the study and participated in the writing of the paper. JT, JB, and GT conceived and  
568 supervised the project. All authors have read and approved the final manuscript.

## 569 **Acknowledgements**

570 The authors want to thank Iona MacLeod from Agriculture Victoria Research, AgriBio, Centre for  
571 AgriBioscience, 5 Ring Road, LaTrobe University, Bundoora, Australia, and Donagh Berry from  
572 Teagasc, Animal & Grassland Research and Innovation Centre, Moorepark, Fermoy P61 P302,  
573 Co. Cork, Ireland for giving the approval for the use of the HD dataset. We also want to  
574 acknowledge the 1000 Bulls Genome Consortium for providing the Run9 WGS dataset.

## 575 **References**

- 576 1. Meuwissen TH, Hayes BJ, Goddard ME. Prediction of total genetic value using genome-wide  
577 dense marker maps. *Genetics*. 2001;157:1819–29. doi:10.1093/genetics/157.4.1819.
- 578 2. García-Ruiz A, Cole JB, VanRaden PM, Wiggans GR, Ruiz-López FJ, van Tassell CP.  
579 Changes in genetic selection differentials and generation intervals in US Holstein dairy cattle  
580 as a result of genomic selection. *Proc Natl Acad Sci U S A*. 2016;113:E3995-4004.  
581 doi:10.1073/pnas.1519061113.
- 582 3. German Livestock Association (BRS). BRS Broschüre Deutsche Holsteins Englisch Re-  
583 Design R1 01. 2021. <https://www.rind-schwein.de/services/files/brs/export/broschueren/P->

- 584 2021-7-7-
- 585 1%20BRS%20Brosch%C3%BCre%20Deutsche%20Holsteins%20Englisch%20Re-
- 586 Design%20R1%20Einzelseiten.pdf. Accessed 18 Sep 2023.
- 587 4. Vereinigte Informationssysteme Tierhaltung w.V. (VIT). Estimation of Breeding Values for
- 588 Milk Production Traits, Somatic Cell Score, Conformation, Productive Life and Reproduction
- 589 Traits in German Dairy Cattle. 2023.
- 590 [https://www.vit.de/fileadmin/DE/Zuchtwertschaetzung/Zws\\_Bes\\_eng.pdf](https://www.vit.de/fileadmin/DE/Zuchtwertschaetzung/Zws_Bes_eng.pdf). Accessed 5 Dec
- 591 2023.
- 592 5. Fleischer P, Metzner M, Beyerbach M, Hoedemaker M, Klee W. The relationship between
- 593 milk yield and the incidence of some diseases in dairy cows. *J Dairy Sci.* 2001;84:2025–35.
- 594 doi:10.3168/jds.S0022-0302(01)74646-2.
- 595 6. Johnsson M, Jungnickel MK. Evidence for and localization of proposed causative variants in
- 596 cattle and pig genomes. *Genet Sel Evol.* 2021;53:67. doi:10.1186/s12711-021-00662-x.
- 597 7. Grisart B, Farnir F, Karim L, Cambisano N, Kim J-J, Kvasz A, et al. Genetic and functional
- 598 confirmation of the causality of the DGAT1 K232A quantitative trait nucleotide in affecting
- 599 milk yield and composition. *Proc Natl Acad Sci U S A.* 2004;101:2398–403.
- 600 doi:10.1073/pnas.0308518100.
- 601 8. Blott S, Kim J-J, Moisisio S, Schmidt-Küntzel A, Cornet A, Berzi P, et al. Molecular dissection
- 602 of a quantitative trait locus: a phenylalanine-to-tyrosine substitution in the transmembrane
- 603 domain of the bovine growth hormone receptor is associated with a major effect on milk yield
- 604 and composition. *Genetics.* 2003;163:253–66. doi:10.1093/genetics/163.1.253.

- 605 9. Visscher PM, Wray NR, Zhang Q, Sklar P, McCarthy MI, Brown MA, Yang J. 10 Years of  
606 GWAS Discovery: Biology, Function, and Translation. *Am J Hum Genet.* 2017;101:5–22.  
607 doi:10.1016/j.ajhg.2017.06.005.
- 608 10. Visscher PM, Brown MA, McCarthy MI, Yang J. Five years of GWAS discovery. *Am J Hum*  
609 *Genet.* 2012;90:7–24. doi:10.1016/j.ajhg.2011.11.029.
- 610 11. Farnir F, Coppieters W, Arranz JJ, Berzi P, Cambisano N, Grisart B, et al. Extensive genome-  
611 wide linkage disequilibrium in cattle. *Genome Res.* 2000;10:220–7. doi:10.1101/gr.10.2.220.
- 612 12. Gibbs RA, Taylor JF, van Tassell CP, Barendse W, Eversole KA, Gill CA, et al. Genome-  
613 wide survey of SNP variation uncovers the genetic structure of cattle breeds. *Science.*  
614 2009;324:528–32. doi:10.1126/science.1167936.
- 615 13. Goddard ME, Kemper KE, MacLeod IM, Chamberlain AJ, Hayes BJ. Genetics of complex  
616 traits: prediction of phenotype, identification of causal polymorphisms and genetic  
617 architecture. *Proc Biol Sci* 2016. doi:10.1098/rspb.2016.0569.
- 618 14. Li N, Stephens M. Modeling linkage disequilibrium and identifying recombination hotspots  
619 using single-nucleotide polymorphism data. *Genetics.* 2003;165:2213–33.  
620 doi:10.1093/genetics/165.4.2213.
- 621 15. Li Y, Willer C, Sanna S, Abecasis G. Genotype imputation. *Annu Rev Genomics Hum Genet.*  
622 2009;10:387–406. doi:10.1146/annurev.genom.9.081307.164242.
- 623 16. Hozé C, Fouilloux M-N, Venot E, Guillaume F, Dassonneville R, Fritz S, et al. High-density  
624 marker imputation accuracy in sixteen French cattle breeds. *Genet Sel Evol.* 2013;45:33.  
625 doi:10.1186/1297-9686-45-33.
- 626 17. Shi S, Yuan N, Yang M, Du Z, Wang J, Sheng X, et al. Comprehensive Assessment of  
627 Genotype Imputation Performance. *Hum Hered.* 2018;83:107–16. doi:10.1159/000489758.

- 628 18. van Binsbergen R, Bink MC, Calus MP, van Eeuwijk FA, Hayes BJ, Hulsegge I, Veerkamp  
629 RF. Accuracy of imputation to whole-genome sequence data in Holstein Friesian cattle. *Genet*  
630 *Sel Evol.* 2014;46:41. doi:10.1186/1297-9686-46-41.
- 631 19. Segelke D, Chen J, Liu Z, Reinhardt F, Thaller G, Reents R. Reliability of genomic prediction  
632 for German Holsteins using imputed genotypes from low-density chips. *J Dairy Sci.*  
633 2012;95:5403–11. doi:10.3168/jds.2012-5466.
- 634 20. Liu Z, Masuda Y. A deregression method for single-step genomic model using all genotype  
635 data. 2021:41–51.
- 636 21. McKenna A, Hanna M, Banks E, Sivachenko A, Cibulskis K, Kernysky A, et al. The Genome  
637 Analysis Toolkit: a MapReduce framework for analyzing next-generation DNA sequencing  
638 data. *Genome Res.* 2010;20:1297–303. doi:10.1101/gr.107524.110.
- 639 22. Browning BL, Zhou Y, Browning SR. A One-Penny Imputed Genome from Next-Generation  
640 Reference Panels. *Am J Hum Genet.* 2018;103:338–48. doi:10.1016/j.ajhg.2018.07.015.
- 641 23. van den Berg I, Ho PN, Nguyen TV, Haile-Mariam M, MacLeod IM, Beatson PR, et al.  
642 GWAS and genomic prediction of milk urea nitrogen in Australian and New Zealand dairy  
643 cattle. *Genet Sel Evol.* 2022;54:15. doi:10.1186/s12711-022-00707-9.
- 644 24. Browning SR, Browning BL. Rapid and accurate haplotype phasing and missing-data  
645 inference for whole-genome association studies by use of localized haplotype clustering. *Am*  
646 *J Hum Genet.* 2007;81:1084–97. doi:10.1086/521987.
- 647 25. Hayes BJ, Daetwyler HD. 1000 Bull Genomes Project to Map Simple and Complex Genetic  
648 Traits in Cattle: Applications and Outcomes. *Annu Rev Anim Biosci.* 2019;7:89–102.  
649 doi:10.1146/annurev-animal-020518-115024.

- 650 26. Danecek P, Bonfield JK, Liddle J, Marshall J, Ohan V, Pollard MO, et al. Twelve years of  
651 SAMtools and BCFtools. *Gigascience* 2021. doi:10.1093/gigascience/giab008.
- 652 27. Browning BL, Browning SR. A unified approach to genotype imputation and haplotype-phase  
653 inference for large data sets of trios and unrelated individuals. *Am J Hum Genet.* 2009;84:210–  
654 23. doi:10.1016/j.ajhg.2009.01.005.
- 655 28. Hunt SE, McLaren W, Gil L, Thormann A, Schuilenburg H, Sheppard D, et al. Ensembl  
656 variation resources. *Database (Oxford)* 2018. doi:10.1093/database/bay119.
- 657 29. Sherry ST, Ward MH, Kholodov M, Baker J, Phan L, Smigielski EM, Sirotkin K. dbSNP: the  
658 NCBI database of genetic variation. *Nucleic Acids Res.* 2001;29:308–11.  
659 doi:10.1093/nar/29.1.308.
- 660 30. Yang J, Lee SH, Goddard ME, Visscher PM. GCTA: a tool for genome-wide complex trait  
661 analysis. *Am J Hum Genet.* 2011;88:76–82. doi:10.1016/j.ajhg.2010.11.011.
- 662 31. R Core Team. *R: A Language and Environment for Statistical Computing* 2022. Vienna,  
663 Austria.
- 664 32. Willer CJ, Li Y, Abecasis GR. METAL: fast and efficient meta-analysis of genomewide  
665 association scans. *Bioinformatics.* 2010;26:2190–1. doi:10.1093/bioinformatics/btq340.
- 666 33. Cingolani P, Platts A, Le Wang L, Coon M, Nguyen T, Wang L, et al. A program for  
667 annotating and predicting the effects of single nucleotide polymorphisms, SnpEff: SNPs in the  
668 genome of *Drosophila melanogaster* strain w1118; iso-2; iso-3. *Fly (Austin).* 2012;6:80–92.  
669 doi:10.4161/fly.19695.
- 670 34. Cingolani P, Patel VM, Coon M, Nguyen T, Land SJ, Ruden DM, Lu X. Using *Drosophila*  
671 *melanogaster* as a Model for Genotoxic Chemical Mutational Studies with a New Program,  
672 SnpSift. *Front Genet.* 2012;3:35. doi:10.3389/fgene.2012.00035.

- 673 35. Wu T, Hu E, Xu S, Chen M, Guo P, Dai Z, et al. clusterProfiler 4.0: A universal enrichment  
674 tool for interpreting omics data. *Innovation (Camb)*. 2021;2:100141.  
675 doi:10.1016/j.xinn.2021.100141.
- 676 36. Yu G, Wang L-G, Yan G-R, He Q-Y. DOSE: an R/Bioconductor package for disease ontology  
677 semantic and enrichment analysis. *Bioinformatics*. 2015;31:608–9.  
678 doi:10.1093/bioinformatics/btu684.
- 679 37. Khatri P, Sirota M, Butte AJ. Ten years of pathway analysis: current approaches and  
680 outstanding challenges. *PLoS Comput Biol*. 2012;8:e1002375.  
681 doi:10.1371/journal.pcbi.1002375.
- 682 38. Kanehisa M, Goto S. KEGG: kyoto encyclopedia of genes and genomes. *Nucleic Acids Res*.  
683 2000;28:27–30. doi:10.1093/nar/28.1.27.
- 684 39. Hu Z-L, Fritz ER, Reecy JM. AnimalQTLdb: a livestock QTL database tool set for positional  
685 QTL information mining and beyond. *Nucleic Acids Res*. 2007;35:D604-9.  
686 doi:10.1093/nar/gkl946.
- 687 40. Mering C von, Huynen M, Jaeggi D, Schmidt S, Bork P, Snel B. STRING: a database of  
688 predicted functional associations between proteins. *Nucleic Acids Res*. 2003;31:258–61.  
689 doi:10.1093/nar/gkg034.
- 690 41. Chen H, Boutros PC. VennDiagram: a package for the generation of highly-customizable  
691 Venn and Euler diagrams in R. *BMC Bioinformatics*. 2011;12:35. doi:10.1186/1471-2105-12-  
692 35.
- 693 42. Yang J, Benyamin B, McEvoy BP, Gordon S, Henders AK, Nyholt DR, et al. Common SNPs  
694 explain a large proportion of the heritability for human height. *Nat Genet*. 2010;42:565–9.  
695 doi:10.1038/ng.608.



- 696 43. Purcell S, Neale B, Todd-Brown K, Thomas L, Ferreira MAR, Bender D, et al. PLINK: a tool  
697 set for whole-genome association and population-based linkage analyses. *Am J Hum Genet.*  
698 2007;81:559–75. doi:10.1086/519795.
- 699 44. Khatkar MS, Moser G, Hayes BJ, Raadsma HW. Strategies and utility of imputed SNP  
700 genotypes for genomic analysis in dairy cattle. *BMC Genomics.* 2012;13:538.  
701 doi:10.1186/1471-2164-13-538.
- 702 45. Bouwman AC, Veerkamp RF. Consequences of splitting whole-genome sequencing effort  
703 over multiple breeds on imputation accuracy. *BMC Genet.* 2014;15:105. doi:10.1186/s12863-  
704 014-0105-8.
- 705 46. Howie B, Marchini J, Stephens M. Genotype imputation with thousands of genomes. *G3*  
706 (Bethesda). 2011;1:457–70. doi:10.1534/g3.111.001198.
- 707 47. Pausch H, MacLeod IM, Fries R, Emmerling R, Bowman PJ, Daetwyler HD, Goddard ME.  
708 Evaluation of the accuracy of imputed sequence variant genotypes and their utility for causal  
709 variant detection in cattle. *Genet Sel Evol.* 2017;49:24. doi:10.1186/s12711-017-0301-x.
- 710 48. Korcuć P, Arends D, Brockmann GA. Finding the Optimal Imputation Strategy for Small  
711 Cattle Populations. *Front Genet.* 2019;10:52. doi:10.3389/fgene.2019.00052.
- 712 49. Pook T, Mayer M, Geibel J, Weigend S, Cavero D, Schoen CC, Simianer H. Improving  
713 Imputation Quality in BEAGLE for Crop and Livestock Data. *G3 (Bethesda).* 2020;10:177–  
714 88. doi:10.1534/g3.119.400798.
- 715 50. Stahl K, Gola D, König IR. Assessment of Imputation Quality: Comparison of Phasing and  
716 Imputation Algorithms in Real Data. *Front Genet.* 2021;12:724037.  
717 doi:10.3389/fgene.2021.724037.

- 718 51. Barendse W. The effect of measurement error of phenotypes on genome wide association  
719 studies. *BMC Genomics*. 2011;12:232. doi:10.1186/1471-2164-12-232.
- 720 52. Kühn C, Thaller G, Winter A, Bininda-Emonds ORP, Kaupe B, Erhardt G, et al. Evidence for  
721 multiple alleles at the DGAT1 locus better explains a quantitative trait locus with major effect  
722 on milk fat content in cattle. *Genetics*. 2004;167:1873–81. doi:10.1534/genetics.103.022749.
- 723 53. Zhang F, Lupski JR. Non-coding genetic variants in human disease. *Hum Mol Genet*.  
724 2015;24:R102-10. doi:10.1093/hmg/ddv259.
- 725 54. Koufariotis L, Chen Y-PP, Bolormaa S, Hayes BJ. Regulatory and coding genome regions are  
726 enriched for trait associated variants in dairy and beef cattle. *BMC Genomics*. 2014;15:436.  
727 doi:10.1186/1471-2164-15-436.
- 728 55. Raven L-A, Cocks BG, Kemper KE, Chamberlain AJ, Vander Jagt CJ, Goddard ME, Hayes  
729 BJ. Targeted imputation of sequence variants and gene expression profiling identifies twelve  
730 candidate genes associated with lactation volume, composition and calving interval in dairy  
731 cattle. *Mamm Genome*. 2016;27:81–97. doi:10.1007/s00335-015-9613-8.
- 732 56. McLaren W, Gil L, Hunt SE, Riat HS, Ritchie GRS, Thormann A, et al. The Ensembl Variant  
733 Effect Predictor. *Genome Biol*. 2016;17:122. doi:10.1186/s13059-016-0974-4.
- 734 57. Prowse-Wilkins CP, Lopdell TJ, Xiang R, Vander Jagt CJ, Littlejohn MD, Chamberlain AJ,  
735 Goddard ME. Genetic variation in histone modifications and gene expression identifies  
736 regulatory variants in the mammary gland of cattle. *BMC Genomics*. 2022;23:815.  
737 doi:10.1186/s12864-022-09002-9.
- 738 58. Ron M, Weller JI. From QTL to QTN identification in livestock--winning by points rather  
739 than knock-out: a review. *Anim Genet*. 2007;38:429–39. doi:10.1111/j.1365-  
740 2052.2007.01640.x.

- 741 59. Xiang R, van Berg I den, MacLeod IM, Hayes BJ, Prowse-Wilkins CP, Wang M, et al.  
742 Quantifying the contribution of sequence variants with regulatory and evolutionary  
743 significance to 34 bovine complex traits. *Proc Natl Acad Sci U S A*. 2019;116:19398–408.  
744 doi:10.1073/pnas.1904159116.
- 745 60. Hemani G, Yang J, Vinkhuyzen A, Powell JE, Willemsen G, Hottenga J-J, et al. Inference of  
746 the genetic architecture underlying BMI and height with the use of 20,240 sibling pairs. *Am J*  
747 *Hum Genet*. 2013;93:865–75. doi:10.1016/j.ajhg.2013.10.005.
- 748 61. Yang J, Weedon MN, Purcell S, Lettre G, Estrada K, Willer CJ, et al. Genomic inflation factors  
749 under polygenic inheritance. *Eur J Hum Genet*. 2011;19:807–12. doi:10.1038/ejhg.2011.39.
- 750 62. Cardon LR, Palmer LJ. Population stratification and spurious allelic association. *Lancet*.  
751 2003;361:598–604. doi:10.1016/S0140-6736(03)12520-2.
- 752 63. Devlin B, Roeder K. Genomic control for association studies. *Biometrics*. 1999;55:997–1004.  
753 doi:10.1111/j.0006-341x.1999.00997.x.
- 754 64. van den Berg S, Vandenplas J, van Eeuwijk FA, Lopes MS, Veerkamp RF. Significance  
755 testing and genomic inflation factor using high-density genotypes or whole-genome sequence  
756 data. *J Anim Breed Genet*. 2019;136:418–29. doi:10.1111/jbg.12419.
- 757 65. Da Pimentel ECG, Erbe M, König S, Simianer H. Genome partitioning of genetic variation  
758 for milk production and composition traits in holstein cattle. *Front Genet*. 2011;2:19.  
759 doi:10.3389/fgene.2011.00019.
- 760 66. Yin T, König S. Genome-wide associations and detection of potential candidate genes for  
761 direct genetic and maternal genetic effects influencing dairy cattle body weight at different  
762 ages. *Genet Sel Evol*. 2019;51:4. doi:10.1186/s12711-018-0444-4.

- 763 67. Speliotes EK, Willer CJ, Berndt SI, Monda KL, Thorleifsson G, Jackson AU, et al. Association  
764 analyses of 249,796 individuals reveal 18 new loci associated with body mass index. *Nat*  
765 *Genet.* 2010;42:937–48. doi:10.1038/ng.686.
- 766 68. Georgiopoulos G, Evangelou E. Power considerations for  $\lambda$  inflation factor in meta-analyses  
767 of genome-wide association studies. *Genet Res (Camb)*. 2016;98:e9.  
768 doi:10.1017/S0016672316000069.
- 769 69. Jia R, Fu Y, Xu L, Li H, Li Y, Liu L, et al. Associations between polymorphisms of SLC22A7,  
770 NGFR, ARNTL and PPP2R2B genes and Milk production traits in Chinese Holstein. *BMC*  
771 *Genom Data*. 2021;22:47. doi:10.1186/s12863-021-01002-0.
- 772 70. Tang D, Yeung J, Lee KY, Matsushita M, Matsui H, Tomizawa K, et al. An isoform of the  
773 neuronal cyclin-dependent kinase 5 (Cdk5) activator. *J Biol Chem*. 1995;270:26897–903.  
774 doi:10.1074/jbc.270.45.26897.
- 775 71. Dhariwala FA, Rajadhyaksha MS. An unusual member of the Cdk family: Cdk5. *Cell Mol*  
776 *Neurobiol*. 2008;28:351–69. doi:10.1007/s10571-007-9242-1.
- 777 72. Talouarn E, Bardou P, Palhière I, Oget C, Clément V, Tosser-Klopp G, et al. Genome wide  
778 association analysis on semen volume and milk yield using different strategies of imputation  
779 to whole genome sequence in French dairy goats. *BMC Genet*. 2020;21:19.  
780 doi:10.1186/s12863-020-0826-9.
- 781 73. Chen X, Cheng Z, Zhang S, Werling D, Wathes DC. Combining Genome Wide Association  
782 Studies and Differential Gene Expression Data Analyses Identifies Candidate Genes Affecting  
783 Mastitis Caused by Two Different Pathogens in the Dairy Cow. *OJAS*. 2015;05:358–93.  
784 doi:10.4236/ojas.2015.54040.

- 785 74. Marín-Garzón NA, Magalhães AFB, Mota LFM, Fonseca LFS, Chardulo LAL, Albuquerque  
786 LG. Genome-wide association study identified genomic regions and putative candidate genes  
787 affecting meat color traits in Nellore cattle. *Meat Sci.* 2021;171:108288.  
788 doi:10.1016/j.meatsci.2020.108288.
- 789 75. Heidaritabar M, Huisman A, Krivushin K, Stothard P, Dervishi E, Charagu P, et al. Imputation  
790 to whole-genome sequence and its use in genome-wide association studies for pork colour  
791 traits in crossbred and purebred pigs. *Front Genet.* 2022;13:1022681.  
792 doi:10.3389/fgene.2022.1022681.
- 793 76. Wu X, Fang M, Liu L, Wang S, Liu J, Ding X, et al. Genome wide association studies for  
794 body conformation traits in the Chinese Holstein cattle population. *BMC Genomics.*  
795 2013;14:897. doi:10.1186/1471-2164-14-897.
- 796 77. Ahmed MI, Elias S, Mould AW, Bikoff EK, Robertson EJ. The transcriptional repressor  
797 Blimp1 is expressed in rare luminal progenitors and is essential for mammary gland  
798 development. *Development.* 2016;143:1663–73. doi:10.1242/dev.136358.
- 799 78. Muncan V, Heijmans J, Krasinski SD, Büller NV, Wildenberg ME, Meisner S, et al. Blimp1  
800 regulates the transition of neonatal to adult intestinal epithelium. *Nat Commun.* 2011;2:452.  
801 doi:10.1038/ncomms1463.
- 802 79. Zhao J, Mialki RK, Wei J, Coon TA, Zou C, Chen BB, et al. SCF E3 ligase F-box protein  
803 complex SCF(FBXL19) regulates cell migration by mediating Rac1 ubiquitination and  
804 degradation. *FASEB J.* 2013;27:2611–9. doi:10.1096/fj.12-223099.
- 805 80. Wei J, Mialki RK, Dong S, Khoo A, Mallampalli RK, Zhao Y, Zhao J. A new mechanism of  
806 RhoA ubiquitination and degradation: roles of SCF(FBXL19) E3 ligase and Erk2. *Biochim*  
807 *Biophys Acta.* 2013;1833:2757–64. doi:10.1016/j.bbamcr.2013.07.005.

- 808 81. Acharya A, Berry DC, Zhang H, Jiang Y, Jones BT, Hammer RE, et al. miR-26 suppresses  
809 adipocyte progenitor differentiation and fat production by targeting Fbxl19. *Genes Dev.*  
810 2019;33:1367–80. doi:10.1101/gad.328955.119.
- 811 82. McNamara JP. Regulation of Adipose Tissue Metabolism in Support of Lactation1. *J Dairy*  
812 *Sci.* 1991;74:706–19.
- 813 83. McNamara JP, Huber K, Kenéz A. A dynamic, mechanistic model of metabolism in adipose  
814 tissue of lactating dairy cattle. *J Dairy Sci.* 2016;99:5649–61. doi:10.3168/jds.2015-9585.
- 815 84. Stelzer G, Rosen N, Plaschkes I, Zimmerman S, Twik M, Fishilevich S, et al. The GeneCards  
816 Suite: From Gene Data Mining to Disease Genome Sequence Analyses. *Curr Protoc*  
817 *Bioinformatics.* 2016;54:1.30.1-1.30.33. doi:10.1002/cpbi.5.
- 818 85. Pombo CM, Force T, Kyriakis J, Nogueira E, Fidalgo M, Zalvide J. The GCK II and III  
819 subfamilies of the STE20 group kinases. *Front Biosci.* 2007;12:850–9. doi:10.2741/2107.
- 820 86. Amrutkar M, Kern M, Nuñez-Durán E, Ståhlman M, Cansby E, Chursa U, et al. Protein kinase  
821 STK25 controls lipid partitioning in hepatocytes and correlates with liver fat content in  
822 humans. *Diabetologia.* 2016;59:341–53. doi:10.1007/s00125-015-3801-7.
- 823 87. Sun X, Wang Y, Loor JJ, Bucktrout R, Shu X, Jia H, et al. High expression of cell death-  
824 inducing DFFA-like effector a (CIDEA) promotes milk fat content in dairy cows with clinical  
825 ketosis. *J Dairy Sci.* 2019;102:1682–92. doi:10.3168/jds.2018-15439.
- 826 88. Cheng J, Xu D, Chen L, Guo W, Hu G, Liu J, Fu S. CIDEA Regulates De Novo Fatty Acid  
827 Synthesis in Bovine Mammary Epithelial Cells by Targeting the AMPK/PPAR $\gamma$  Axis and  
828 Regulating SREBP1. *J Agric Food Chem.* 2022;70:11324–35. doi:10.1021/acs.jafc.2c05226.

- 829 89. van Knegsel ATM, van den Brand H, Dijkstra J, Tamminga S, Kemp B. Effect of dietary  
830 energy source on energy balance, production, metabolic disorders and reproduction in  
831 lactating dairy cattle. *Reprod Nutr Dev*. 2005;45:665–88. doi:10.1051/rnd:2005059.
- 832 90. Nerstedt A, Cansby E, Andersson CX, Laakso M, Stančáková A, Blüher M, et al.  
833 Serine/threonine protein kinase 25 (STK25): a novel negative regulator of lipid and glucose  
834 metabolism in rodent and human skeletal muscle. *Diabetologia*. 2012;55:1797–807.  
835 doi:10.1007/s00125-012-2511-7.
- 836 91. Butkinaree C, Guo L, Ramkhelawon B, Wanschel A, Brodsky JL, Moore KJ, Fisher EA. A  
837 regulator of secretory vesicle size, Kelch-like protein 12, facilitates the secretion of  
838 apolipoprotein B100 and very-low-density lipoproteins--brief report. *Arterioscler Thromb*  
839 *Vasc Biol*. 2014;34:251–4. doi:10.1161/ATVBAHA.113.302728.
- 840 92. Chan L. Apolipoprotein B, the major protein component of triglyceride-rich and low density  
841 lipoproteins. *J Biol Chem*. 1992;267:25621–4.
- 842 93. Bauchart D. Lipid absorption and transport in ruminants. *J Dairy Sci*. 1993;76:3864–81.  
843 doi:10.3168/jds.S0022-0302(93)77728-0.
- 844 94. Oikawa S, Katoh N, Kawawa F, Ono Y. Decreased serum apolipoprotein B-100 and A-I  
845 concentrations in cows with ketosis and left displacement of the abomasum. *Am J Vet Res*.  
846 1997;58:121–5.
- 847 95. Oikawa S, Katoh N. Decreases in serum apolipoprotein B-100 and A-I concentrations in cows  
848 with milk fever and downer cows. *Can J Vet Res*. 2002;66:31–4.
- 849 96. Shi X, Xiang S, Cao J, Zhu H, Yang B, He Q, Ying M. Kelch-like proteins: Physiological  
850 functions and relationships with diseases. *Pharmacol Res*. 2019;148:104404.  
851 doi:10.1016/j.phrs.2019.104404.

- 852 97. Angers S, Thorpe CJ, Biechele TL, Goldenberg SJ, Zheng N, MacCoss MJ, Moon RT. The  
853 KLHL12-Cullin-3 ubiquitin ligase negatively regulates the Wnt-beta-catenin pathway by  
854 targeting Dishevelled for degradation. *Nat Cell Biol.* 2006;8:348–57. doi:10.1038/ncb1381.
- 855 98. Steinhart Z, Angers S. Wnt signaling in development and tissue homeostasis. *Development*  
856 2018. doi:10.1242/dev.146589.
- 857 99. Jin L, Pahuja KB, Wickliffe KE, Gorur A, Baumgärtel C, Schekman R, Rape M. Ubiquitin-  
858 dependent regulation of COPII coat size and function. *Nature.* 2012;482:495–500.  
859 doi:10.1038/nature10822.
- 860 100. Varki A, Cummings RD, Esko JD, Stanley P, Hart GW, Aebi M, et al., editors. *Essentials*  
861 *of glycobiology.* Cold Spring Harbor: Cold Spring Harbor Laboratory Press; 2022.
- 862 101. Aebi M. N-linked protein glycosylation in the ER. *Biochim Biophys Acta.*  
863 2013;1833:2430–7. doi:10.1016/j.bbamcr.2013.04.001.
- 864 102. Schwarz F, Aebi M. Mechanisms and principles of N-linked protein glycosylation. *Curr*  
865 *Opin Struct Biol.* 2011;21:576–82. doi:10.1016/j.sbi.2011.08.005.
- 866 103. Kelleher DJ, Gilmore R. An evolving view of the eukaryotic oligosaccharyltransferase.  
867 *Glycobiology.* 2006;16:47R-62R. doi:10.1093/glycob/cwj066.
- 868 104. Barboza M, Pinzon J, Wickramasinghe S, Froehlich JW, Moeller I, Smilowitz JT, et al.  
869 Glycosylation of human milk lactoferrin exhibits dynamic changes during early lactation  
870 enhancing its role in pathogenic bacteria-host interactions. *Mol Cell Proteomics.*  
871 2012;11:M111.015248. doi:10.1074/mcp.M111.015248.
- 872 105. Rascón-Cruz Q, Espinoza-Sánchez EA, Siqueiros-Cendón TS, Nakamura-Bencomo SI,  
873 Arévalo-Gallegos S, Iglesias-Figueroa BF. Lactoferrin: A Glycoprotein Involved in



- 874 Immunomodulation, Anticancer, and Antimicrobial Processes. *Molecules* 2021.  
875 doi:10.3390/molecules26010205.
- 876 106. Zhou P, Xie W, He S, Sun Y, Meng X, Sun G, Sun X. Ginsenoside Rb1 as an Anti-Diabetic  
877 Agent and Its Underlying Mechanism Analysis. *Cells* 2019. doi:10.3390/cells8030204.
- 878 107. Zou H, Zhang M, Zhu X, Zhu L, Chen S, Luo M, et al. Ginsenoside Rb1 Improves  
879 Metabolic Disorder in High-Fat Diet-Induced Obese Mice Associated With Modulation of Gut  
880 Microbiota. *Front Microbiol.* 2022;13:826487. doi:10.3389/fmicb.2022.826487.
- 881 108. Hemmings BA, Restuccia DF. PI3K-PKB/Akt pathway. *Cold Spring Harb Perspect Biol.*  
882 2012;4:a011189. doi:10.1101/cshperspect.a011189.
- 883 109. Vanhaesebroeck B, Guillermet-Guibert J, Graupera M, Bilanges B. The emerging  
884 mechanisms of isoform-specific PI3K signalling. *Nat Rev Mol Cell Biol.* 2010;11:329–41.  
885 doi:10.1038/nrm2882.
- 886 110. Hou Y, Xie Y, Yang S, Han B, Shi L, Bai X, et al. EEF1D facilitates milk lipid synthesis  
887 by regulation of PI3K-Akt signaling in mammals. *FASEB J.* 2021;35:e21455.  
888 doi:10.1096/fj.202000682RR.
- 889 111. Bole-Feysot C, Goffin V, Edery M, Binart N, Kelly PA. Prolactin (PRL) and its receptor:  
890 actions, signal transduction pathways and phenotypes observed in PRL receptor knockout  
891 mice. *Endocr Rev.* 1998;19:225–68. doi:10.1210/edrv.19.3.0334.
- 892 112. Hardy KM, Booth BW, Hendrix MJC, Salomon DS, Strizzi L. ErbB/EGF signaling and  
893 EMT in mammary development and breast cancer. *J Mammary Gland Biol Neoplasia.*  
894 2010;15:191–9. doi:10.1007/s10911-010-9172-2.

- 895 113. Monkkonen T, Lewis MT. New paradigms for the Hedgehog signaling network in  
896 mammary gland development and breast Cancer. *Biochim Biophys Acta Rev Cancer*.  
897 2017;1868:315–32. doi:10.1016/j.bbcan.2017.06.003.
- 898 114. Chen Q, Zhang N, Gray RS, Li H, Ewald AJ, Zahnow CA, Pan D. A temporal requirement  
899 for Hippo signaling in mammary gland differentiation, growth, and tumorigenesis. *Genes Dev*.  
900 2014;28:432–7. doi:10.1101/gad.233676.113.
- 901 115. Werb Z, Sympton CJ, Alexander CM, Thomasset N, Lund LR, MacAuley A, et al.  
902 Extracellular matrix remodeling and the regulation of epithelial-stromal interactions during  
903 differentiation and involution. *Kidney Int Suppl*. 1996;54:S68-74.
- 904 116. Du A, Zhao F, Liu Y, Xu L, Chen K, Sun D, Han B. Genetic polymorphisms of PKLR  
905 gene and their associations with milk production traits in Chinese Holstein cows. *Front Genet*.  
906 2022;13:1002706. doi:10.3389/fgene.2022.1002706.
- 907 117. Liu Z, Zhang C, Lee S, Kim W, Klevstig M, Harzandi AM, et al. Pyruvate kinase L/R is a  
908 regulator of lipid metabolism and mitochondrial function. *Metab Eng*. 2019;52:263–72.  
909 doi:10.1016/j.ymben.2019.01.001.
- 910 118. Atashi H, Bastin C, Wilmot H, Vanderick S, Hubin X, Gengler N. Genome-wide  
911 association study for selected cheese-making properties in Dual-Purpose Belgian Blue cows.  
912 *J Dairy Sci*. 2022;105:8972–88. doi:10.3168/jds.2022-21780.
- 913 119. Costa A, Schwarzenbacher H, Mészáros G, Fuerst-Waltl B, Fuerst C, Sölkner J, Penasa M.  
914 On the genomic regions associated with milk lactose in Fleckvieh cattle. *J Dairy Sci*.  
915 2019;102:10088–99. doi:10.3168/jds.2019-16663.
- 916 120. Huang QX, Yang J, Hu M, Lu W, Zhong K, Wang Y, et al. Milk fat globule membrane  
917 proteins are involved in controlling the size of milk fat globules during conjugated linoleic

- 918 acid-induced milk fat depression. *J Dairy Sci.* 2022;105:9179–90. doi:10.3168/jds.2022-  
919 22131.
- 920 121. UniProt: the Universal Protein Knowledgebase in 2023. *Nucleic Acids Res.*  
921 2023;51:D523-D531. doi:10.1093/nar/gkac1052.
- 922 122. Soares RAN, Vargas G, Duffield T, Schenkel F, Squires EJ. Genome-wide association  
923 study and functional analyses for clinical and subclinical ketosis in Holstein cattle. *J Dairy*  
924 *Sci.* 2021;104:10076–89. doi:10.3168/jds.2020-20101.
- 925 123. Ding Y, Cui J, Wang Q, Shen S, Xu T, Tang H, et al. The Vitamin K Epoxide Reductase  
926 Vkorc111 Promotes Preadipocyte Differentiation in Mice. *Obesity (Silver Spring).*  
927 2018;26:1303–11. doi:10.1002/oby.22206.
- 928 124. Lacasse P, Ollier S, Lollivier V, Boutinaud M. New insights into the importance of  
929 prolactin in dairy ruminants. *J Dairy Sci.* 2016;99:864–74. doi:10.3168/jds.2015-10035.
- 930 125. Pedrosa VB, Schenkel FS, Chen S-Y, Oliveira HR, Casey TM, Melka MG, Brito LF.  
931 Genomewide Association Analyses of Lactation Persistency and Milk Production Traits in  
932 Holstein Cattle Based on Imputed Whole-Genome Sequence Data. *Genes (Basel)* 2021.  
933 doi:10.3390/genes12111830.
- 934 126. Olayioye MA, Neve RM, Lane HA, Hynes NE. The ErbB signaling network: receptor  
935 heterodimerization in development and cancer. *EMBO J.* 2000;19:3159–67.  
936 doi:10.1093/emboj/19.13.3159.
- 937 127. Moraes RC, Chang H, Harrington N, Landua JD, Prigge JT, Lane TF, et al. Ptch1 is  
938 required locally for mammary gland morphogenesis and systemically for ductal elongation.  
939 *Development.* 2009;136:1423–32. doi:10.1242/dev.023994.

- 940 128. Palombo V, Milanese M, Sgorlon S, Capomaccio S, Mele M, Nicolazzi E, et al. Genome-  
941 wide association study of milk fatty acid composition in Italian Simmental and Italian Holstein  
942 cows using single nucleotide polymorphism arrays. *J Dairy Sci.* 2018;101:11004–19.  
943 doi:10.3168/jds.2018-14413.
- 944 129. Korkuć P, Arends D, May K, König S, Brockmann GA. Genomic Loci Affecting Milk  
945 Production in German Black Pied Cattle (DSN). *Front Genet.* 2021;12:640039.  
946 doi:10.3389/fgene.2021.640039.
- 947 130. Xu R, Boudreau A, Bissell MJ. Tissue architecture and function: dynamic reciprocity via  
948 extra- and intra-cellular matrices. *Cancer Metastasis Rev.* 2009;28:167–76.  
949 doi:10.1007/s10555-008-9178-z.
- 950 131. Nayeri S, Sargolzaei M, Abo-Ismael MK, Miller S, Schenkel F, Moore SS, Stothard P.  
951 Genome-wide association study for lactation persistency, female fertility, longevity, and  
952 lifetime profit index traits in Holstein dairy cattle. *J Dairy Sci.* 2017;100:1246–58.  
953 doi:10.3168/jds.2016-11770.
- 954 132. Yang J, Zeng J, Goddard ME, Wray NR, Visscher PM. Concepts, estimation and  
955 interpretation of SNP-based heritability. *Nat Genet.* 2017;49:1304–10. doi:10.1038/ng.3941.
- 956 133. Barry C-JS, Walker VM, Cheesman R, Davey Smith G, Morris TT, Davies NM. How to  
957 estimate heritability: a guide for genetic epidemiologists. *Int J Epidemiol.* 2023;52:624–32.  
958 doi:10.1093/ije/dyac224.
- 959 134. Hassel C, Gausserès B, Guzylack-Piriou L, Foucras G. Ductal Macrophages Predominate  
960 in the Immune Landscape of the Lactating Mammary Gland. *Front Immunol.* 2021;12:754661.  
961 doi:10.3389/fimmu.2021.754661.

- 962 135. Michelotti TC, Kisby BR, Flores LS, Tegeler AP, Fokar M, Crasto C, et al. Single-nuclei  
963 analysis reveals depot-specific transcriptional heterogeneity and depot-specific cell types in  
964 adipose tissue of dairy cows. *Front Cell Dev Biol.* 2022;10:1025240.  
965 doi:10.3389/fcell.2022.1025240.
- 966 136. Shang P, Li W, Liu G, Zhang J, Li M, Wu L, et al. Identification of lncRNAs and Genes  
967 Responsible for Fatness and Fatty Acid Composition Traits between the Tibetan and Yorkshire  
968 Pigs. *Int J Genomics.* 2019;2019:5070975. doi:10.1155/2019/5070975.
- 969 137. Zhang X, Zhang S, Ma L, Jiang E, Xu H, Chen R, et al. Reduced representation bisulfite  
970 sequencing (RRBS) of dairy goat mammary glands reveals DNA methylation profiles of  
971 integrated genome-wide and critical milk-related genes. *Oncotarget.* 2017;8:115326–44.  
972 doi:10.18632/oncotarget.23260.
- 973 138. Igoshin AV, Deniskova TE, Yurchenko AA, Yudin NS, Dotsev AV, Selionova MI, et al.  
974 Copy number variants in genomes of local sheep breeds from Russia. *Anim Genet.*  
975 2022;53:119–32. doi:10.1111/age.13163.
- 976 139. Steri R, Moioli B, Catillo G, Galli A, Buttazzoni L. Genome-wide association study for  
977 longevity in the Holstein cattle population. *Animal.* 2019;13:1350–7.  
978 doi:10.1017/S1751731118003191.
- 979 140. Briand N, Dugail I, Le Lay S. Cavin proteins: New players in the caveolae field. *Biochimie.*  
980 2011;93:71–7. doi:10.1016/j.biochi.2010.03.022.
- 981 141. Parton RG, Simons K. The multiple faces of caveolae. *Nat Rev Mol Cell Biol.* 2007;8:185–  
982 94. doi:10.1038/nrm2122.

- 983 142. Liu L, Brown D, McKee M, Lebrasseur NK, Yang D, Albrecht KH, et al. Deletion of  
984 Cavin/PTRF causes global loss of caveolae, dyslipidemia, and glucose intolerance. *Cell*  
985 *Metab.* 2008;8:310–7. doi:10.1016/j.cmet.2008.07.008.
- 986 143. Morteau O, Gerard C, Lu B, Ghiran S, Rits M, Fujiwara Y, et al. An indispensable role for  
987 the chemokine receptor CCR10 in IgA antibody-secreting cell accumulation. *J Immunol.*  
988 2008;181:6309–15. doi:10.4049/jimmunol.181.9.6309.
- 989 144. Wang W, Soto H, Oldham ER, Buchanan ME, Homey B, Catron D, et al. Identification of  
990 a novel chemokine (CCL28), which binds CCR10 (GPR2). *J Biol Chem.* 2000;275:22313–23.  
991 doi:10.1074/jbc.M001461200.
- 992 145. Illa SK, Mukherjee S, Nath S, Mukherjee A. Genome-Wide Scanning for Signatures of  
993 Selection Revealed the Putative Genomic Regions and Candidate Genes Controlling Milk  
994 Composition and Coat Color Traits in Sahiwal Cattle. *Front Genet.* 2021;12:699422.  
995 doi:10.3389/fgene.2021.699422.
- 996 146. Do DN, Bissonnette N, Lacasse P, Miglior F, Sargolzaei M, Zhao X, Ibeagha-Awemu EM.  
997 Genome-wide association analysis and pathways enrichment for lactation persistency in  
998 Canadian Holstein cattle. *J Dairy Sci.* 2017;100:1955–70. doi:10.3168/jds.2016-11910.
- 999 147. Jiang J, Ma L, Prakapenka D, VanRaden PM, Cole JB, Da Y. A Large-Scale Genome-  
1000 Wide Association Study in U.S. Holstein Cattle. *Front Genet.* 2019;10:412.  
1001 doi:10.3389/fgene.2019.00412.
- 1002 148. Le Guillou S, Sdassi N, Laubier J, Passet B, Vilotte M, Castille J, et al. Overexpression of  
1003 miR-30b in the developing mouse mammary gland causes a lactation defect and delays  
1004 involution. *PLoS One.* 2012;7:e45727. doi:10.1371/journal.pone.0045727.

- 1005 149. Silva ÉF, Lopes MS, Lopes PS, Gasparino E. A genome-wide association study for feed  
1006 efficiency-related traits in a crossbred pig population. *Animal*. 2019;13:2447–56.  
1007 doi:10.1017/S1751731119000910.
- 1008 150. Lee J, Kim Y, Cho E, Cho K, Sa S, Kim Y, et al. Genomic Analysis Using Bayesian  
1009 Methods under Different Genotyping Platforms in Korean Duroc Pigs. *Animals (Basel)* 2020.  
1010 doi:10.3390/ani10050752.
- 1011 151. Lee J-E, Cho Y-W, Deng C-X, Ge K. MLL3/MLL4-Associated PAGR1 Regulates  
1012 Adipogenesis by Controlling Induction of C/EBP $\beta$  and C/EBP $\delta$ . *Mol Cell Biol* 2020.  
1013 doi:10.1128/MCB.00209-20.
- 1014 152. Garcia M, Greco LF, Lock AL, Block E, Santos JEP, Thatcher WW, Staples CR.  
1015 Supplementation of essential fatty acids to Holstein calves during late uterine life and first  
1016 month of life alters hepatic fatty acid profile and gene expression. *J Dairy Sci*. 2016;99:7085–  
1017 101. doi:10.3168/jds.2015-10472.
- 1018 153. Huang Z, Wu L-M, Zhang J-L, Sabri A, Wang S-J, Qin G-J, et al. Dual Specificity  
1019 Phosphatase 12 Regulates Hepatic Lipid Metabolism Through Inhibition of the Lipogenesis  
1020 and Apoptosis Signal-Regulating Kinase 1 Pathways. *Hepatology*. 2019;70:1099–118.  
1021 doi:10.1002/hep.30597.
- 1022 154. Jiang J, Cole JB, Freebern E, Da Y, VanRaden PM, Ma L. Functional annotation and  
1023 Bayesian fine-mapping reveals candidate genes for important agronomic traits in Holstein  
1024 bulls. *Commun Biol*. 2019;2:212. doi:10.1038/s42003-019-0454-y.
- 1025 155. Aloor JJ, Azzam KM, Guardiola JJ, Gowdy KM, Madenspacher JH, Gabor KA, et al.  
1026 Leucine-rich repeats and calponin homology containing 4 (Lrch4) regulates the innate immune  
1027 response. *J Biol Chem*. 2019;294:1997–2008. doi:10.1074/jbc.RA118.004300.

- 1028 156. Zhang M, Ma Z, Qi H, Cui X, Li R, Gao X. Comparative transcriptomic analysis of  
1029 mammary gland tissues reveals the critical role of GPR110 in palmitic acid-stimulated milk  
1030 protein and fat synthesis. *Br J Nutr.* 2023;1–13. doi:10.1017/S0007114523000788.
- 1031 157. Blaas L, Pucci F, Messal HA, Andersson AB, Josue Ruiz E, Gerling M, et al. Lgr6 labels  
1032 a rare population of mammary gland progenitor cells that are able to originate luminal  
1033 mammary tumours. *Nat Cell Biol.* 2016;18:1346–56. doi:10.1038/ncb3434.
- 1034 158. Di Gerlando R, Sutera AM, Mastrangelo S, Tolone M, Portolano B, Sottile G, et al.  
1035 Genome-wide association study between CNVs and milk production traits in Valle del Belice  
1036 sheep. *PLoS One.* 2019;14:e0215204. doi:10.1371/journal.pone.0215204.
- 1037 159. Sutera AM, Riggio V, Mastrangelo S, Di Gerlando R, Sardina MT, Pong-Wong R, et al.  
1038 Genome-wide association studies for milk production traits in Valle del Belice sheep using  
1039 repeated measures. *Anim Genet.* 2019;50:311–4. doi:10.1111/age.12789.
- 1040 160. Wang R, Shen J, Chen Y, Gao J, Yao J. Fatty acid metabolism-related signature predicts  
1041 survival in patients with clear cell renal carcinoma. *Aging (Albany NY).* 2022;14:9969–79.  
1042 doi:10.18632/aging.204433.
- 1043 161. Bolormaa S, Hayes BJ, van der Werf JHJ, Pethick D, Goddard ME, Daetwyler HD.  
1044 Detailed phenotyping identifies genes with pleiotropic effects on body composition. *BMC*  
1045 *Genomics.* 2016;17:224. doi:10.1186/s12864-016-2538-0.
- 1046 162. Lu Y, Day FR, Gustafsson S, Buchkovich ML, Na J, Bataille V, et al. New loci for body  
1047 fat percentage reveal link between adiposity and cardiometabolic disease risk. *Nat Commun.*  
1048 2016;7:10495. doi:10.1038/ncomms10495.
- 1049 163. Bowman SR. Investigation of the role of bovine mammary stem cells in the lactation cycle  
1050 [PhD thesis]: The University of Sydney; 2016.



- 1051 164. Niska-Blakie J, Gopinathan L, Low KN, Kien YL, Goh CMF, Caldez MJ, et al. Knockout  
1052 of the non-essential gene SUGCT creates diet-linked, age-related microbiome disbalance with  
1053 a diabetes-like metabolic syndrome phenotype. *Cell Mol Life Sci.* 2020;77:3423–39.  
1054 doi:10.1007/s00018-019-03359-z.
- 1055 165. Kweon S-M, Irimia-Dominguez J, Kim G, Fueger PT, Asahina K, Lai KK, et al.  
1056 Heterozygous midnolin knockout attenuates severity of nonalcoholic fatty liver disease in  
1057 mice fed a Western-style diet high in fat, cholesterol, and fructose. *Am J Physiol Gastrointest*  
1058 *Liver Physiol.* 2023;325:G147-G157. doi:10.1152/ajpgi.00011.2023.
- 1059 166. Zhang Y, Li C, Hu C, Wu Q, Cai Y, Xing S, et al. Lin28 enhances de novo fatty acid  
1060 synthesis to promote cancer progression via SREBP-1. *EMBO Rep.* 2019;20:e48115.  
1061 doi:10.15252/embr.201948115.
- 1062 167. Jiang D-X, Zhang J-B, Li M-T, Lin S-Z, Wang Y-Q, Chen Y-W, Fan J-G. Prolyl  
1063 endopeptidase gene disruption attenuates high fat diet-induced nonalcoholic fatty liver disease  
1064 in mice by improving hepatic steatosis and inflammation. *Ann Transl Med.* 2020;8:218.  
1065 doi:10.21037/atm.2020.01.14.
- 1066 168. Shin J, Syme C, Wang D, Richer L, Pike GB, Gaudet D, et al. Novel Genetic Locus of  
1067 Visceral Fat and Systemic Inflammation. *J Clin Endocrinol Metab.* 2019;104:3735–42.  
1068 doi:10.1210/jc.2018-02656.
- 1069 169. Zhang Z-G, Zhang H-S, Sun H-L, Liu H-Y, Liu M-Y, Zhou Z. KDM5B promotes breast  
1070 cancer cell proliferation and migration via AMPK-mediated lipid metabolism reprogramming.  
1071 *Exp Cell Res.* 2019;379:182–90. doi:10.1016/j.yexcr.2019.04.006.

- 1072 170. Ye JJ, Bian X, Lim J, Medzhitov R. Adiponectin and related C1q/TNF-related proteins  
1073 bind selectively to anionic phospholipids and sphingolipids. Proc Natl Acad Sci U S A.  
1074 2020;117:17381–8. doi:10.1073/pnas.1922270117.
- 1075 171. Naserkheil M, Bahrami A, Lee D, Mehrban H. Integrating Single-Step GWAS and  
1076 Bipartite Networks Reconstruction Provides Novel Insights into Yearling Weight and Carcass  
1077 Traits in Hanwoo Beef Cattle. Animals (Basel) 2020. doi:10.3390/ani10101836.
- 1078 172. Sutera AM. Comparison of Genome Wide Association Studies for milk production traits  
1079 in Valle del Belice dairy sheep [PhD Thesis]: Università degli Studi di Palermo; 2018.

## 1080 **Figures**

1081 Figure 1. Manhattan plot for milk yield

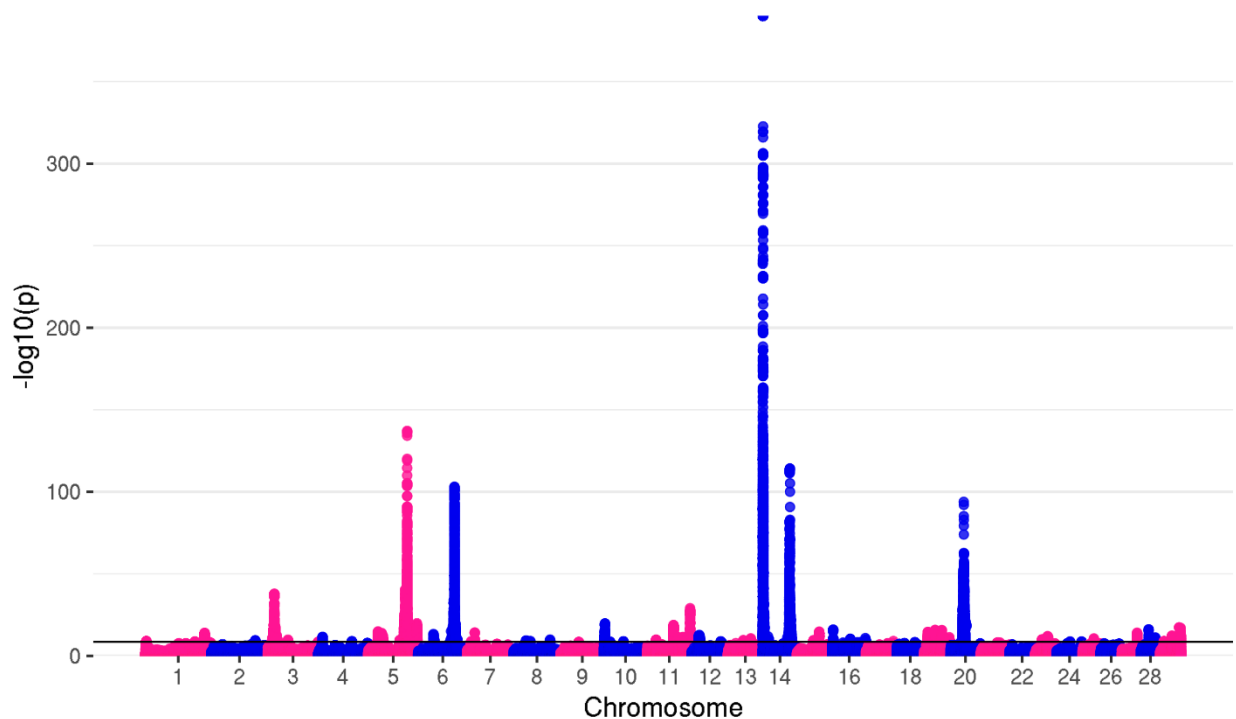

1082

1083 The top genome-wide SNP ( $p = 7.04 \times 10^{-737}$ ) for MY was located on BTA14. However, RStudio used for the creation  
1084 of this plot was not able to show  $p$ -values  $< 10 \times 10^{-325}$ , reporting them as “0”. Therefore, ylim had to be set lower, to  
1085 provisional ylim of 390, in order to present all significant variants

1086

1087 Figure 2. Manhattan plot for fat yield

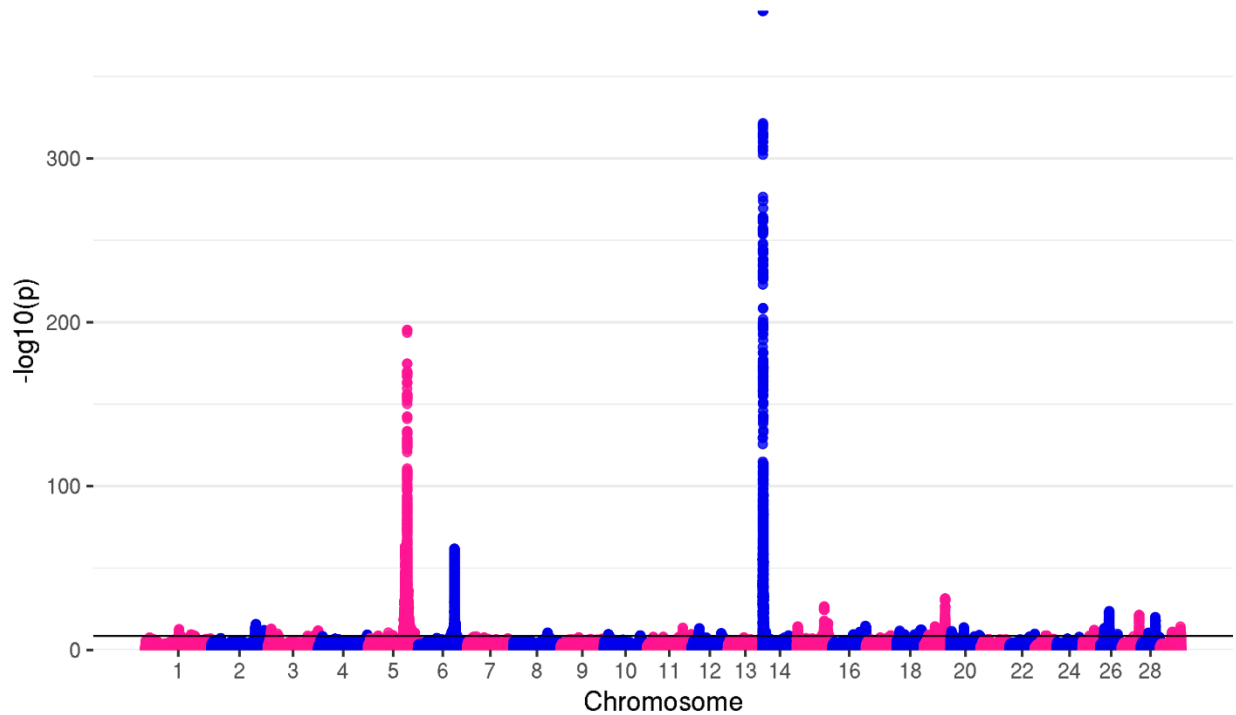

1088

1089 The top genome-wide SNP ( $p = 7.18 \times 10^{-380}$ ) for FY was positioned on BTA14. However, RStudio used for the creation  
1090 of this plot was not able to show  $p$ -values  $< 10 \times 10^{-325}$ , reporting them as “0”. Therefore, ylim had to be set lower, to  
1091 provisional ylim of 390, in order to present all significant variants

1092

1093 Figure 3. Manhattan plot for protein yield

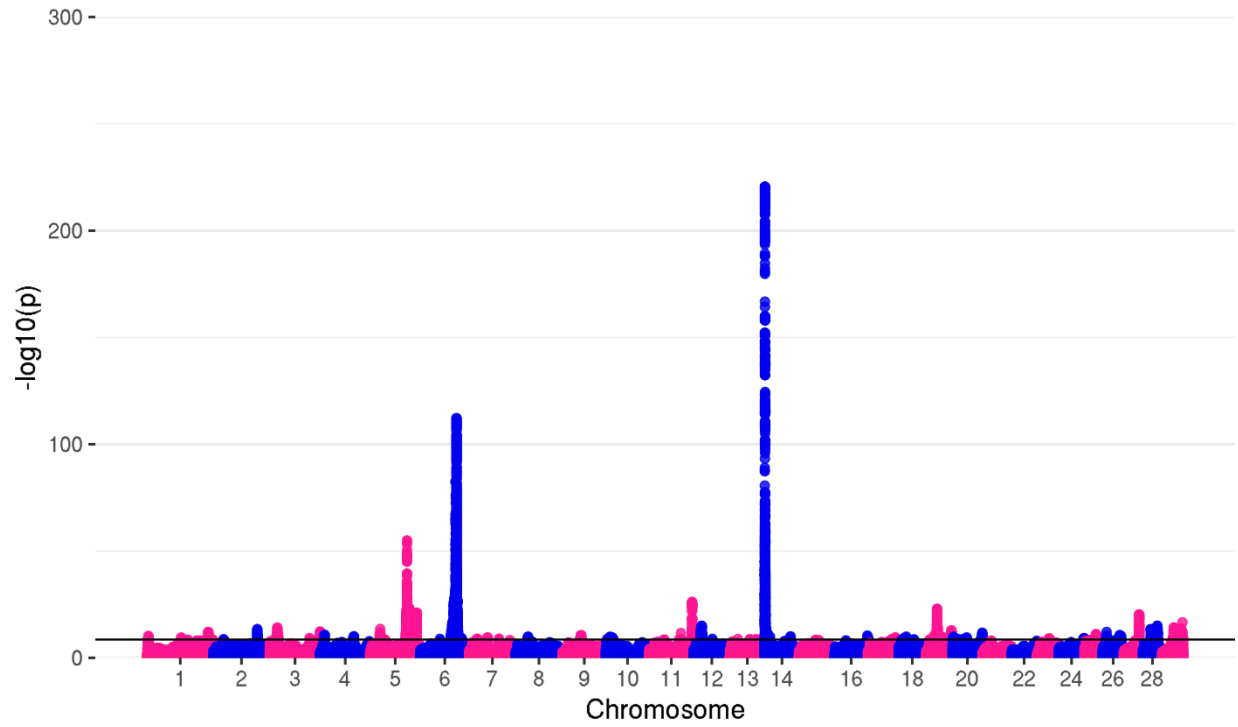

1094

1095

1096 Figure 4. Venn diagram of MY, FY, and PY showing concordant and discordant candidate genes

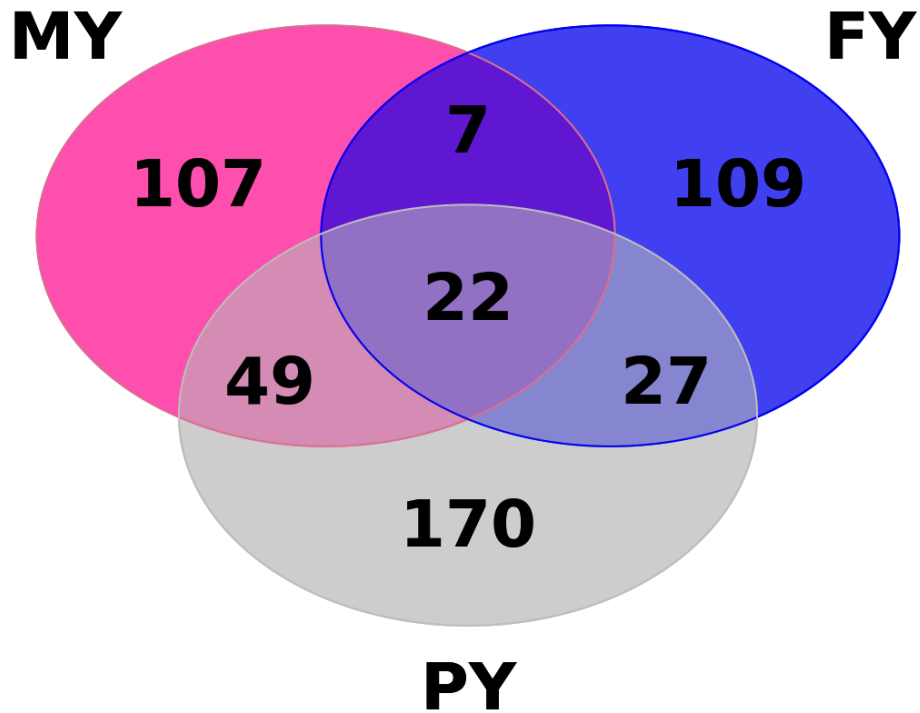

1097

1098 Figure 5. Genomic inflation factors of MY measured on direct GWAS summary statistics and after  
1099 meta-analysis

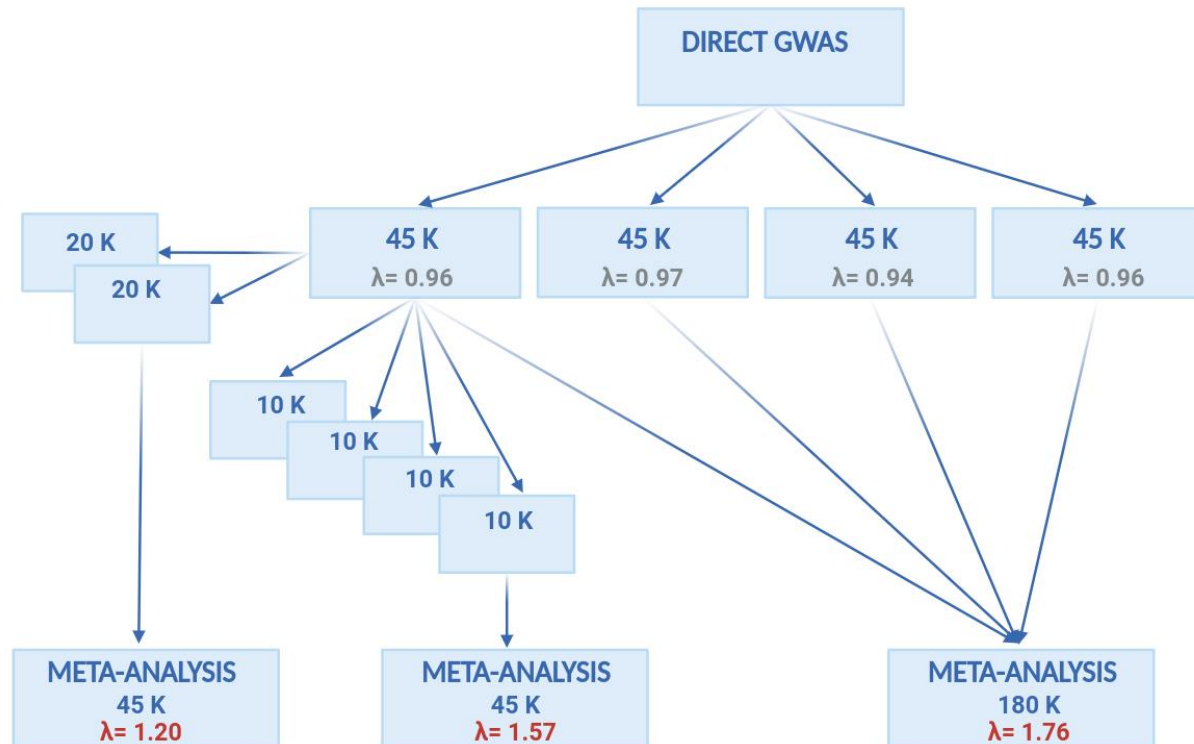

1100  
1101 To check the cause of genomic inflation in meta-analysis summary statistics, one of the animal groups on which we  
1102 ran direct GWAS was divided into two groups. For each of the two groups, GWAS was run again, and summary  
1103 statistics were merged into the meta-analysis. Lambda values obtained on meta-analysis summary statistics were  
1104 higher ( $\lambda = 1.20$ ) than ones measured for the same individuals on direct GWAS summary statistics ( $\lambda = 0.96$ ). To further  
1105 check the extent of inflation caused by meta-analysis, the same group of animals was divided again, this time, into  
1106 four groups. GWAS was run for each of the groups and results were merged into the meta-analysis. Lambda values  
1107 were even higher this time ( $\lambda = 1.57$ ). The figure was created with BioRender.com

1108  
1109 Figure 6. Enrich KEGG dot plot of 18 most significant pathways for MY, FY, and PY

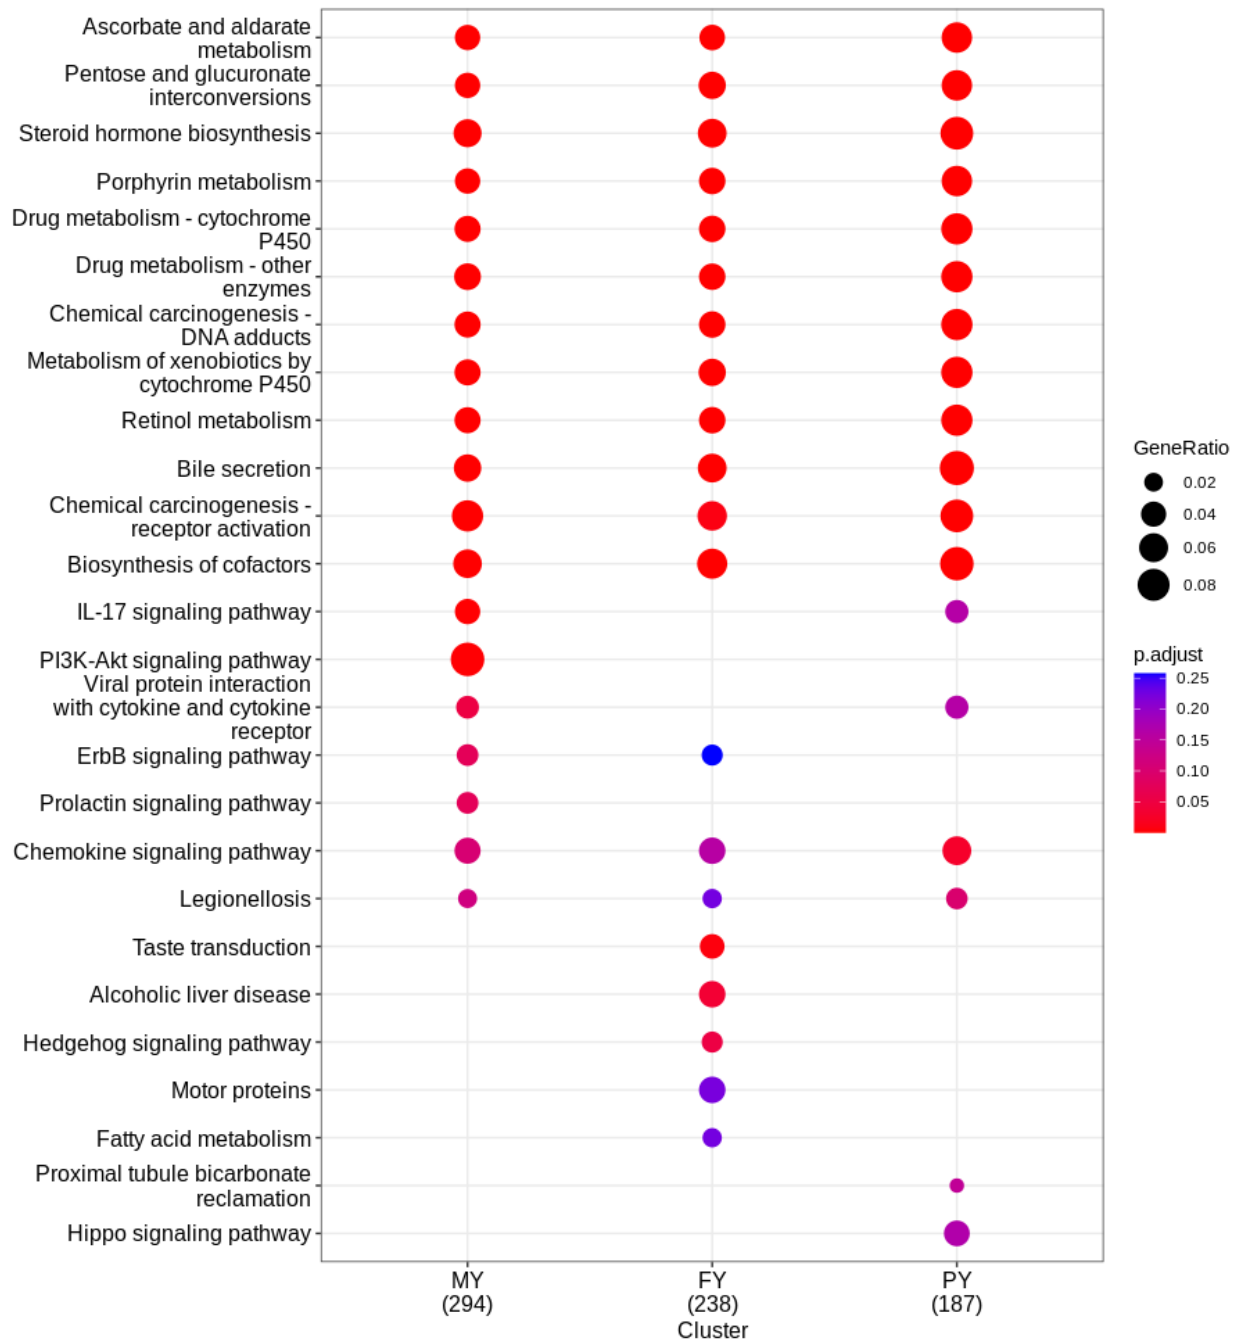

1110

1111

## 1112 Tables

1113 **Table 1 Over-represented genes associated with top variants for MY, FY, and PY**

| <b>Term</b>                                   | <b>MY</b>                                           | <b>FY</b>                      | <b>PY</b>            |
|-----------------------------------------------|-----------------------------------------------------|--------------------------------|----------------------|
| PI3K-Akt signaling pathway                    | <i>EFNA1, EFNA3, EFNA4, THBS3, LAMA5, GHR, IGF2</i> |                                |                      |
| Biosynthesis of amino acids                   | <i>PKLR</i>                                         |                                |                      |
| Maturity onset diabetes of the young          | <i>PKLR</i>                                         |                                |                      |
| Biosynthesis of cofactors                     | <i>FLAD1</i>                                        | <i>GMPPA, VKORC1L1</i>         | <i>VKORC1L1</i>      |
| Chemical carcinogenesis - receptor activation | <i>MGST1, STAT5B, STAT3, STAT5A</i>                 | <i>MGST1, MIRLET7E</i>         | <i>RB1, ARRB2</i>    |
| Metabolism of xenobiotics by cytochrome P450  | <i>MGST1</i>                                        | <i>MGST1</i>                   |                      |
| Chemical carcinogenesis - DNA adducts         | <i>MGST1</i>                                        | <i>MGST1</i>                   |                      |
| Drug metabolism - other enzymes               | <i>MGST1</i>                                        | <i>MGST1</i>                   |                      |
| Drug metabolism - cytochrome P450             | <i>MGST1</i>                                        | <i>MGST1</i>                   |                      |
| Chemokine signaling pathway                   | <i>STAT5B, STAT3, CXCL16, CCR10</i>                 |                                | <i>CXCL16, ARRB2</i> |
| Prolactin signaling pathway                   | <i>STAT5B, STAT3, STAT5A, TH</i>                    |                                |                      |
| ErbB signaling pathway                        | <i>STAT5B, STAT5A</i>                               |                                |                      |
| Cytokine-cytokine receptor interaction        | <i>CD70, CXCL16, CCR10, GHR</i>                     |                                |                      |
| Alcoholic liver disease                       |                                                     | <i>TRA2B, SCD, LPIN1</i>       |                      |
| Motor proteins                                |                                                     | <i>TUBA4A, DYNLRB2, TUBA1D</i> |                      |

|                                                               |                     |                      |                       |
|---------------------------------------------------------------|---------------------|----------------------|-----------------------|
| Viral protein interaction with cytokine and cytokine receptor | <i>CCR10</i>        |                      |                       |
| Hedgehog signaling pathway                                    |                     | <i>PTCH1</i>         |                       |
| Fatty acid metabolism                                         |                     | <i>HSD17B12, SCD</i> |                       |
| Steroid hormone biosynthesis                                  |                     | <i>HSD17B12</i>      |                       |
| Proximal tubule bicarbonate reclamation                       |                     |                      | <i>SLC4A4, SLC9A3</i> |
| Bile secretion                                                | <i>SLC4A4</i>       |                      | <i>SLC4A4, SLC9A3</i> |
| Hippo signaling pathway                                       |                     |                      | <i>NKD2</i>           |
| ECM-receptor interaction                                      | <i>THBS3, LAMA5</i> |                      |                       |

1114

1115 **Table 2 Genetic variance explained by top and random variants for MY, FY, and PY**

| Trait     | $V_{TOP}$ | $SE_{TOP}$ | $V_{RANDOM}$ | $SE_{RANDOM}$ |
|-----------|-----------|------------|--------------|---------------|
| <b>MY</b> | 0.086677  | 0.012530   | 0.003195     | 0.002656      |
|           |           |            | 0.015675     | 0.003461      |
|           |           |            | 0.005690     | 0.002973      |
|           |           |            | 0.005522     | 0.002872      |
|           |           |            | 0.008892     | 0.003040      |
| <b>FY</b> | 0.070413  | 0.010478   | 0.003675     | 0.002497      |
|           |           |            | 0.001819     | 0.002540      |
|           |           |            | 0.004907     | 0.002939      |
|           |           |            | 0.001645     | 0.002567      |
|           |           |            | 0.003471     | 0.002572      |
| <b>PY</b> | 0.066613  | 0.009325   | 0.003456     | 0.002645      |



|  |  |  |          |          |
|--|--|--|----------|----------|
|  |  |  | 0.007485 | 0.002946 |
|  |  |  | 0.003309 | 0.002646 |
|  |  |  | 0.001254 | 0.002492 |
|  |  |  | 0.002862 | 0.002649 |

1116  $V_{TOP}$  = genetic variance explained by top genome-wide significant variants from autosomal chromosomes

1117  $SE_{TOP}$  = standard error of top variants

1118  $V_{RANDOM}$  = genetic variance explained by random 50 variants from all autosomal chromosome

1119  $SE_{RANDOM}$  = standard error of random variants

1120

1121 **Table 3 New candidate genes for milk production traits**

| TRAIT | CHR | GENE          | FUNCTION                                                                                                                                                                                                                                                                                                                                                                                                                                                                                                                                                                                                     |
|-------|-----|---------------|--------------------------------------------------------------------------------------------------------------------------------------------------------------------------------------------------------------------------------------------------------------------------------------------------------------------------------------------------------------------------------------------------------------------------------------------------------------------------------------------------------------------------------------------------------------------------------------------------------------|
| MY    | 2   | <i>CDK5R2</i> | Described in the main text                                                                                                                                                                                                                                                                                                                                                                                                                                                                                                                                                                                   |
|       | 7   | <i>ADGRE1</i> | Eight intergenic variants were identified between <i>VAVI</i> and <i>ADGRE1</i> . <i>ADGRE1</i> was found to be highly expressed in the macrophage cells in the lactating murine mammary gland [134]. It was detected in periparturient dairy cows' visceral adipose tissue, in a study by Michelotti et al. [135] that investigated differences between adipose tissue cells in their contribution to the development of metabolic diseases in cattle in the period before and after calving. Association analysis in pigs showed a significant association of this gene with eicosenoic acid content [136] |
|       | 9   | <i>PRDMI</i>  | Described in the main text                                                                                                                                                                                                                                                                                                                                                                                                                                                                                                                                                                                   |
|       | 16  | <i>CASZI</i>  | 24 intron variants were located within the <i>CASZI</i> gene. In the differential methylation analysis in dairy goats [137] this gene was reported to be downregulated in the lactation period, relative to the dry period. Another study [138] reported copy number variation (CNVR) in the same gene to be connected with milk traits of local sheep breed. In cattle, it has been associated with longevity [139], however, this is the first time that this gene has been associated with milk traits in cattle                                                                                          |
|       | 19  | <i>CAVINI</i> | Two intergenic variants were located in the proximity of <i>CAVINI</i> , a gene belonging to the group of cavin proteins, that play an important role in caveolae formation [140]. Caveolae are plasma membrane domains with a crucial role in lipid regulation in various cell types [141]. <i>CAVINI</i>                                                                                                                                                                                                                                                                                                   |

|    |    |               |                                                                                                                                                                                                                                                                                                                                                                                                                                                                                                        |
|----|----|---------------|--------------------------------------------------------------------------------------------------------------------------------------------------------------------------------------------------------------------------------------------------------------------------------------------------------------------------------------------------------------------------------------------------------------------------------------------------------------------------------------------------------|
|    |    |               | knockout mice lacked caveolae and exhibited various metabolic disorders including hyperlipidemia and glucose intolerance [142]                                                                                                                                                                                                                                                                                                                                                                         |
|    | 19 | <i>CCR10</i>  | One variant upstream of the <i>CCR10</i> gene was found to be significantly associated with milk yield. Experiments on mice lacking <i>CCR10</i> [143] showed that <i>CCR10</i> is essential for efficient localization and accumulation of IgA antibody-secreting cells in lactating mammary glands. Interestingly, <i>CCR10</i> acts as a receptor for <i>CCL28</i> [144], known QTL for milk composition traits, lactation persistency [145, 146], fat and protein percentage, and milk yield [147] |
|    | 24 | <i>RNF152</i> | The intergenic variant was located between <i>RNF152</i> and <i>PIGN</i> . In the study on transgenic mice, <i>RNF152</i> was downregulated during involution day 6 [148]. It was also described as a candidate gene for average daily gain and average daily feed intake in crossbred pigs [149], backfat thickness, and other production and growth-related traits in Korean Duroc pigs [150]                                                                                                        |
|    | 25 | <i>FBXL19</i> | Described in the main text                                                                                                                                                                                                                                                                                                                                                                                                                                                                             |
|    | 25 | <i>PAGRI</i>  | One variant upstream of <i>PAGRI</i> , a gene that has an essential role in adipogenesis [151] was significantly associated with MY                                                                                                                                                                                                                                                                                                                                                                    |
| FY | 3  | <i>STK25</i>  | Described in the main text                                                                                                                                                                                                                                                                                                                                                                                                                                                                             |
|    | 3  | <i>DUSP12</i> | Two intergenic variants were positioned close to the <i>DUSP12</i> gene on BTA3. Previously, this gene was found to be upregulated in the liver of offspring of dams supplemented with essential fatty acids, compared to dams fed with saturated fatty acids [152]. In another study, <i>DUSP12</i> was proposed as a regulator of hepatic lipid metabolism [153], suggesting possible involvement with milk fat composition                                                                          |
|    | 8  | <i>PTCH1</i>  | One intergenic variant was located between <i>PTCH1</i> and <i>ENSBTAG00000049821</i> on BTA8. <i>PTCH1</i> (Patched 1) regulates ductal morphogenesis in mammary epithelium and stroma, and ductal elongation and ovarian hormone responsiveness in the pituitary gland, as shown in the study of Moraes et al. [127]. It was also associated with body depth and strength in the Holstein bulls fine-mapping study [154]. In our case, it was enriched in the Hedgehog signaling pathway             |
|    | 12 | <i>LRCH1</i>  | Two intron variants on BTA12 were associated with the <i>LRCH1</i> gene, which has a role in lipid regulation, including the promotion of lipopolysaccharide (LPS) binding and its delivery to lipid rafts [155]                                                                                                                                                                                                                                                                                       |
|    | 16 | <i>KLHL12</i> | Described in the main text                                                                                                                                                                                                                                                                                                                                                                                                                                                                             |

|    |    |               |                                                                                                                                                                                                                                                                                                                                              |
|----|----|---------------|----------------------------------------------------------------------------------------------------------------------------------------------------------------------------------------------------------------------------------------------------------------------------------------------------------------------------------------------|
|    | 16 | <i>LGR6</i>   | On the same chromosome, one intron variant was found in <i>LGR6</i> , the gene that was found to be related to lactation in the study of Zhang et al. [156]. Blaas et al. [157] found <i>LGR6</i> to be involved with various functions in postnatal mammary gland development, making it a strong candidate for further research            |
|    | 17 | <i>MED13L</i> | On BTA17, one intergenic variant was found between <i>MED13L</i> and <i>ENSBTAG00000052624</i> . While functions of <i>ENSBTAG00000052624</i> haven't been described yet, <i>MED13L</i> was associated with milk yield and somatic cell score (SCS) in a dairy sheep [158], therefore indicating a similar role in other mammals             |
|    | 23 | <i>MCCD1</i>  | One variant upstream of gene <i>MCCD1</i> was associated with FY, and although little is known about <i>MCCD1</i> function, this gene was previously associated with fat and protein percentage in dairy sheep GWAS [159] and with the regulation of fatty acid synthesis in patients with renal cancer [160]                                |
| PY | 2  | <i>CDK5R2</i> | Described in the MY section                                                                                                                                                                                                                                                                                                                  |
|    | 3  | <i>FARP2</i>  | On BTA3, 15 variants were found within or downstream of the <i>FARP2</i> gene. In multi-trait GWAS on body composition traits [161] <i>FARP2</i> was described to be associated with body composition traits and as being able to bind to phospholipids and cytoskeleton                                                                     |
|    | 3  | <i>STK25</i>  | Described in the main text                                                                                                                                                                                                                                                                                                                   |
|    | 3  | <i>CRCT1</i>  | One intergenic variant on BTA3 was positioned between <i>ENSBTAG00000050431</i> and <i>CRCT1</i> . While little is known about <i>ENSBTAG00000050431</i> , <i>CRCT1</i> was previously described as a new candidate gene for body fat percentage in humans [162] and might have a role in developing mammary gland, as shown in cattle [163] |
|    | 4  | <i>SUGCT</i>  | Within the <i>SUGCT</i> gene, three intron variants were found. <i>SUGCT</i> -knockout mice exhibited an imbalance in lipid and acylcarnitine metabolism [164]                                                                                                                                                                               |
|    | 7  | <i>MIDN</i>   | One intron variant was located in the <i>MIDN</i> gene which has a role in regulating cholesterol/lipid metabolism in the liver [165]                                                                                                                                                                                                        |
|    | 9  | <i>LIN28B</i> | The two variants on BTA9 were identified in or in proximity with <i>LIN28B</i> . <i>LIN28A</i> and its homolog <i>LIN28B</i> were reported to enhance <i>de novo</i> fatty acid synthesis and metabolic conversion of saturated to unsaturated fatty acids [166]                                                                             |
|    | 9  | <i>PRDMI</i>  | Described in the main text                                                                                                                                                                                                                                                                                                                   |

|  |    |               |                                                                                                                                                                                                                                                        |
|--|----|---------------|--------------------------------------------------------------------------------------------------------------------------------------------------------------------------------------------------------------------------------------------------------|
|  |    |               |                                                                                                                                                                                                                                                        |
|  | 9  | <i>PREP</i>   | Next, 14 variants were identified close to the <i>PREP</i> (prolyl endopeptidase) gene on BTA9. Previously, it was shown that <i>PREP</i> knockout mice exhibited changes in hepatic lipid metabolism [167]                                            |
|  | 9  | <i>CRYBG1</i> | One intron variant on BTA9 was identified on <i>CRYBG1</i> , a gene that was shown to participate in the regulation of fat-cell differentiation [168]                                                                                                  |
|  | 12 | <i>RBI</i>    | Described in the main text                                                                                                                                                                                                                             |
|  | 16 | <i>KDM5B</i>  | Two intron variants on BTA16 were found within <i>KDM5B</i> , a gene that was identified as a regulator of lipid metabolism reprogramming in breast cancer cells [169]                                                                                 |
|  | 16 | <i>KLHL12</i> | Described in the main text                                                                                                                                                                                                                             |
|  | 18 | <i>CBLNI</i>  | The intergenic variant was located in proximity to <i>CBLNI</i> , a member of the C1q family of proteins that has been reported to have a lipid-binding ability [170]                                                                                  |
|  | 23 | <i>ZNF391</i> | On BTA23, two variants were close to the <i>ZNF391</i> gene, previously associated with the marbling score in Hanwoo beef cattle [171] and somatic cell count in dairy cattle [73]. In dairy sheep GWAS [172] this gene was connected with milk traits |
|  | 24 | <i>RNF152</i> | Described in the MY section                                                                                                                                                                                                                            |
|  | 25 | <i>FBXL19</i> | Described in the main text                                                                                                                                                                                                                             |
|  | 29 | <i>STT3A</i>  | Described in the main text                                                                                                                                                                                                                             |

1122

## 1123 **Additional files**

### 1124 **Additional file 1**

1125 Format: .pdf

### 1126 **Additional file 1 Table S1**

1127 Title: Genotype arrays used for samples genotyping

1128 **Additional file 1 Table S2**

1129 Title: Composition of breeds of WGS reference panel

1130 **Additional file 1 Table S3**

1131 Title: Candidate genes associated with the top 50 variants for MY, FY, and PY

1132 **Additional file 1 Table S4**

1133 Title: Common genes between the three milk production traits

1134 **Additional file 1 Table S5**

1135 Title: Number of variant effects by type

1136 **Additional file 1 Table S6**

1137 Title: Functional Enrichment Analysis results for MY, FY, and PY

1138 **Additional file 1 Table S7**

1139 Title: List of known milk production and composition candidate genes identified in our study

1140 **Additional file 1 Figure S1**

1141 Format: .png

1142 Title: Concordance between imputed KuhVision AF and 1000 Bulls Run9 AF from BTA16

1143 **Additional file 2**

1144 Format: .xlsx

1145 **Additional file 2 Table S1**

1146 Title: List of top variants for MY

1147 **Additional file 2 Table S2**

1148 Title: List of top variants for FY

1149 **Additional file 2 Table S3**

1150 Title: List of top variants for PY

1151 **Additional file 3**

1152 Format: .xlsx

1153 **Additional file 3 Table S1**

1154 Title: List of all genome-wide significant variants and their effects for MY

1155 **Additional file 3 Table S2**

1156 Title: List of all genome-wide significant variants and their effects for FY

1157 **Additional file 3 Table S3**

1158 Title: List of all genome-wide significant variants and their effects for PY

1159 **Additional file 4**

1160 Format: .xlsx

1161 **Additional file 4 Table S1**

1162 Title: Genes whose functions couldn't be linked with milk production traits
